# Supplementary material for: Recovery of facial expressions using functional electrical stimulation after full-face transplantation
Source: J Neuroeng Rehabil. 2018 Mar 6;15:15. doi: 10.1186/s12984-018-0356-0 (PMC5840782; doi:10.1186/s12984-018-0356-0)
Supplement: Supplementary file 1 — Recovery of facial expressions using functional electrical stimulation after full-face transplantation. (DOCX 6090 kb) [file 12984_2018_356_MOESM1_ESM.docx]

**Recovery of facial expressions using functional electrical stimulation**

**after full-face transplantation**

**Supplementary Material**

Çağdaş Topçu MSc1,2, Hilmi Uysal MD3, Ömer Özkan MD4, Özlenen Özkan MD4,

Övünç Polat PhD1, Merve Bedeloğlu MSc1, Arzu Akgül MSc1, Ela Naz Döğer BSc1,

Refik Sever PhD1, Ömer Halil Çolak PhD1

1Akdeniz University, Faculty of Engineering, Department of Electrical-Electronics Engineering

2Medical University of Graz, Institute of Physiology

3Akdeniz University, Faculty of Medicine, Department of Neurology

4Akdeniz University, Faculty of Medicine, Department of Plastic and Reconstructive Surgery

Corresponding author:

Çağdaş Topçu

Faculty of Engineering, Department of Electrical-Electronics Engineering, Akdeniz University

Dumlupınar Bulv. 07058 Campus Antalya, Turkey

Institute of Physiology, Medical University of Graz

Harrachgasse 21/5, 8010 Graz, Austria

Phone: +43 676 5758329

E-mail: [cagdas.topcu@medunigraz.at](mailto:cagdas.topcu@medunigraz.at)

Çağdaş Topçu [cagdas.topcu@medunigraz.at](mailto:cagdas.topcu@medunigraz.at)

Hilmi Uysal [uysalh@akdeniz.edu.tr](mailto:uysalh@akdeniz.edu.tr)

Ömer Özkan [omozkan@hotmail.com](mailto:omozkan@hotmail.com)

Özlenen Özkan [ozlenend@yahoo.com](mailto:ozlenend@yahoo.com)

Övünç Polat [ovuncpolat@akdeniz.edu.tr](mailto:ovuncpolat@akdeniz.edu.tr)

Merve Bedeloğlu [mrvbedeloglu@gmail.com](mailto:mrvbedeloglu@gmail.com)

Arzu Akgül [arzuakgul@akdeniz.edu.tr](mailto:arzuakgul@akdeniz.edu.tr)

Ela Naz Döğer [elanazdoger@gmail.com](mailto:elanazdoger@gmail.com)

Refik Sever [refiksever@gmail.com](mailto:refiksever@gmail.com)

Ömer Halil Çolak [omercol@akdeniz.edu.tr](mailto:omercol@akdeniz.edu.tr)

**Figure S1:** Facial muscle activity representations based on the FuzzyEn method for the lip funneling facial movement. A) Estimated muscle activities of patient A before rehabilitation. B) Estimated muscle activities of patient A after rehabilitation. C, F) Mean value of estimated muscle activities of ten healthy individuals. D) Estimated muscle activities of patient B before rehabilitation. E) Estimated muscle activities of patient B after rehabilitation.


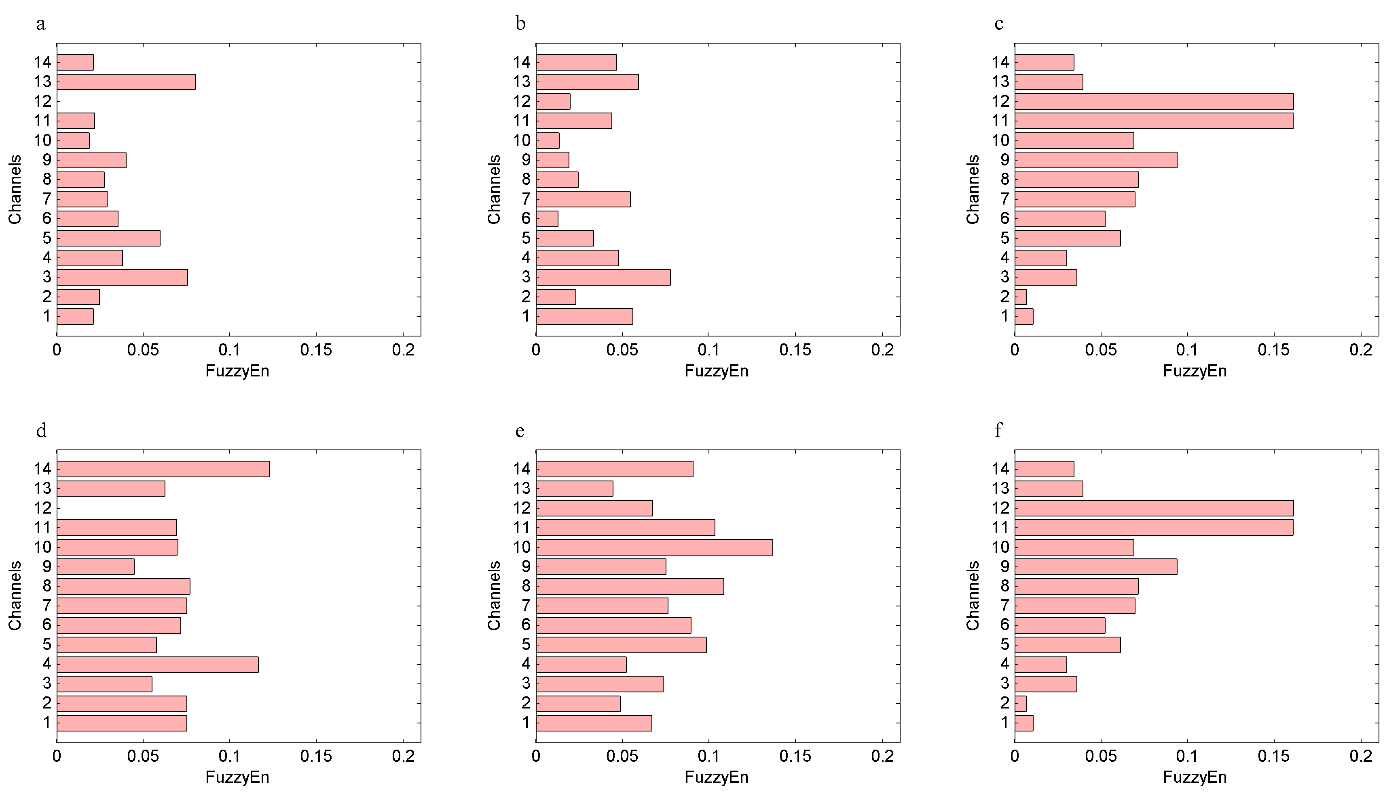


**Figure S2:** Facial muscle activity representations on a 3D face model based on the FuzzyEn method for the lip funneling facial movement. A) Estimated muscle activities of patient A before rehabilitation. B) Estimated muscle activities of patient A after rehabilitation. C, F) Mean value of estimated muscle activities of ten healthy individuals. D) Estimated muscle activities of patient B before rehabilitation. E) Estimated muscle activities of patient B after rehabilitation.
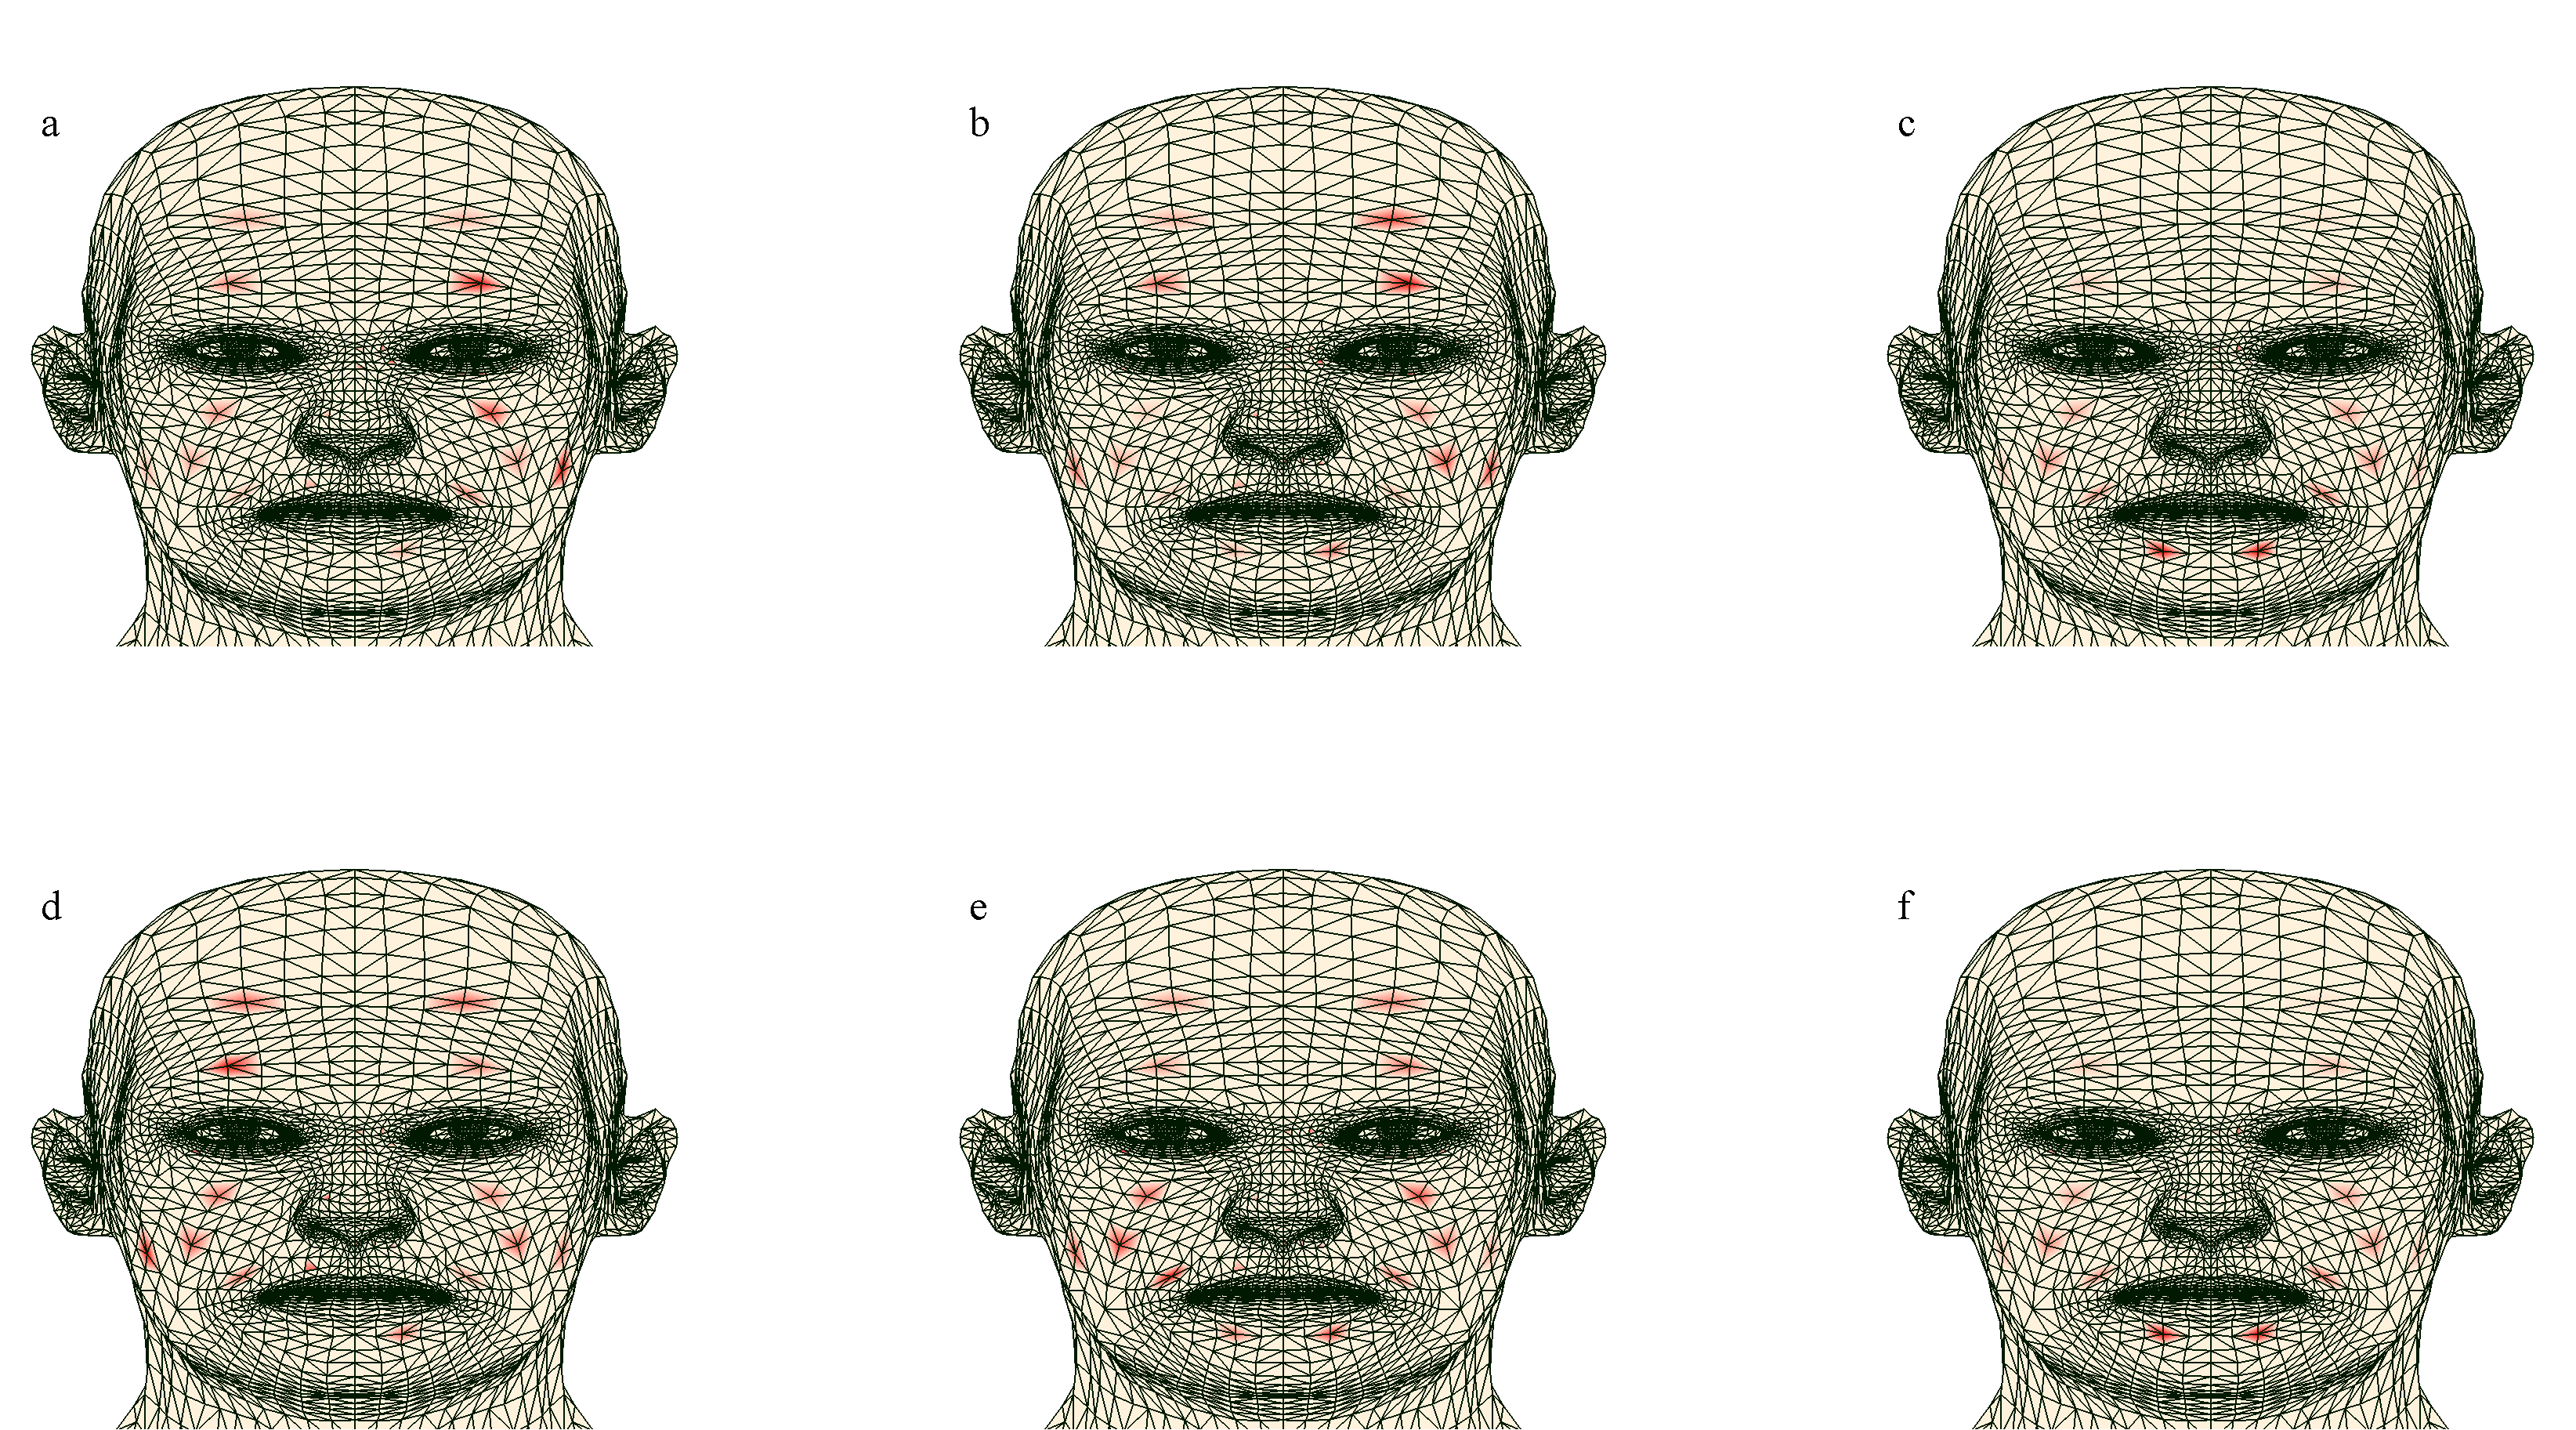


**Figure S3:** Facial muscle activity representations based on the FuzzyEn method for the lip puckering facial movement. A) Estimated muscle activities of patient A before rehabilitation. B) Estimated muscle activities of patient A after rehabilitation. C, F) Mean value of estimated muscle activities of ten healthy individuals. D) Estimated muscle activities of patient B before rehabilitation. E) Estimated muscle activities of patient B after rehabilitation.


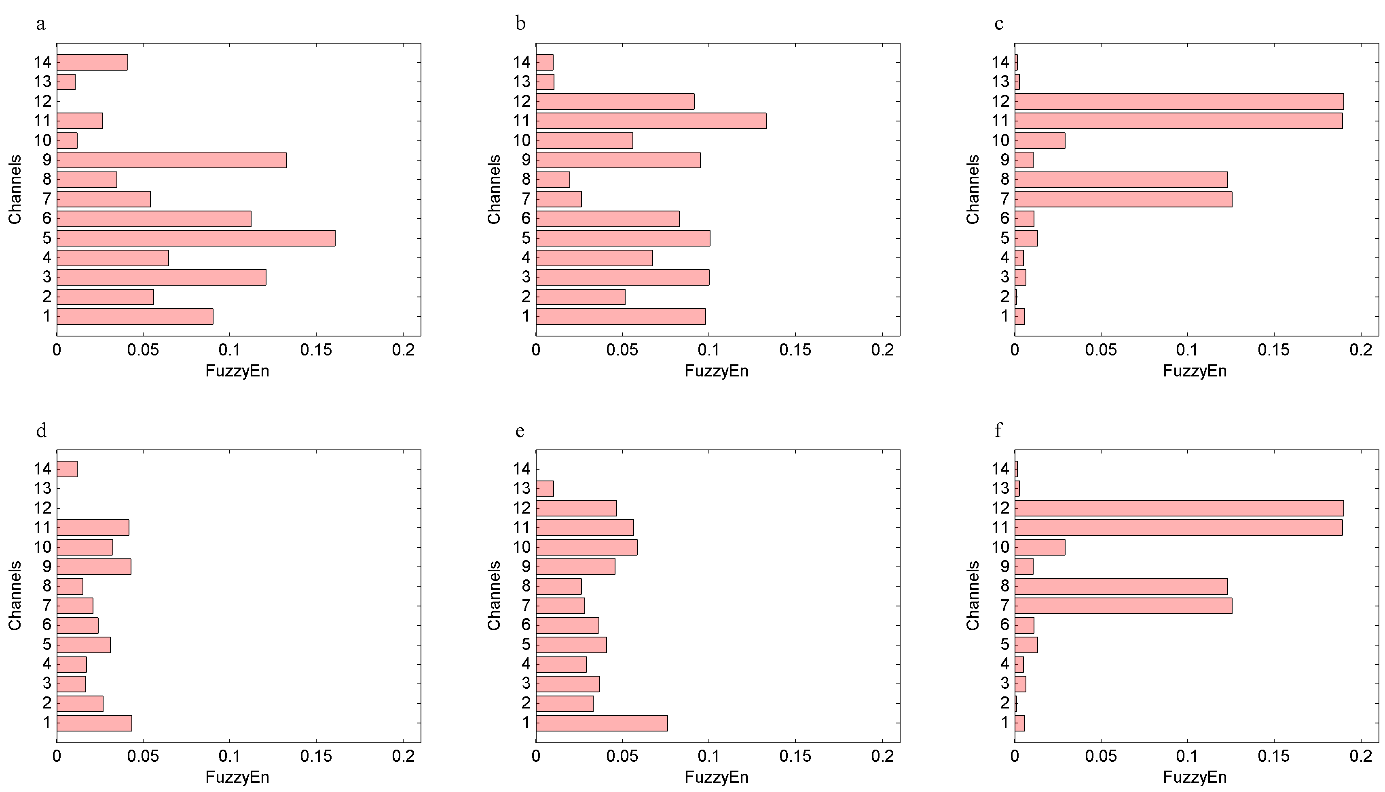


**Figure S4:** Facial muscle activity representations on a 3D face model based on the FuzzyEn method for the lip puckering facial movement. A) Estimated muscle activities of patient A before rehabilitation. B) Estimated muscle activities of patient A after rehabilitation. C, F) Mean value of estimated muscle activities of ten healthy individuals. D) Estimated muscle activities of patient B before rehabilitation. E) Estimated muscle activities of patient B after rehabilitation.


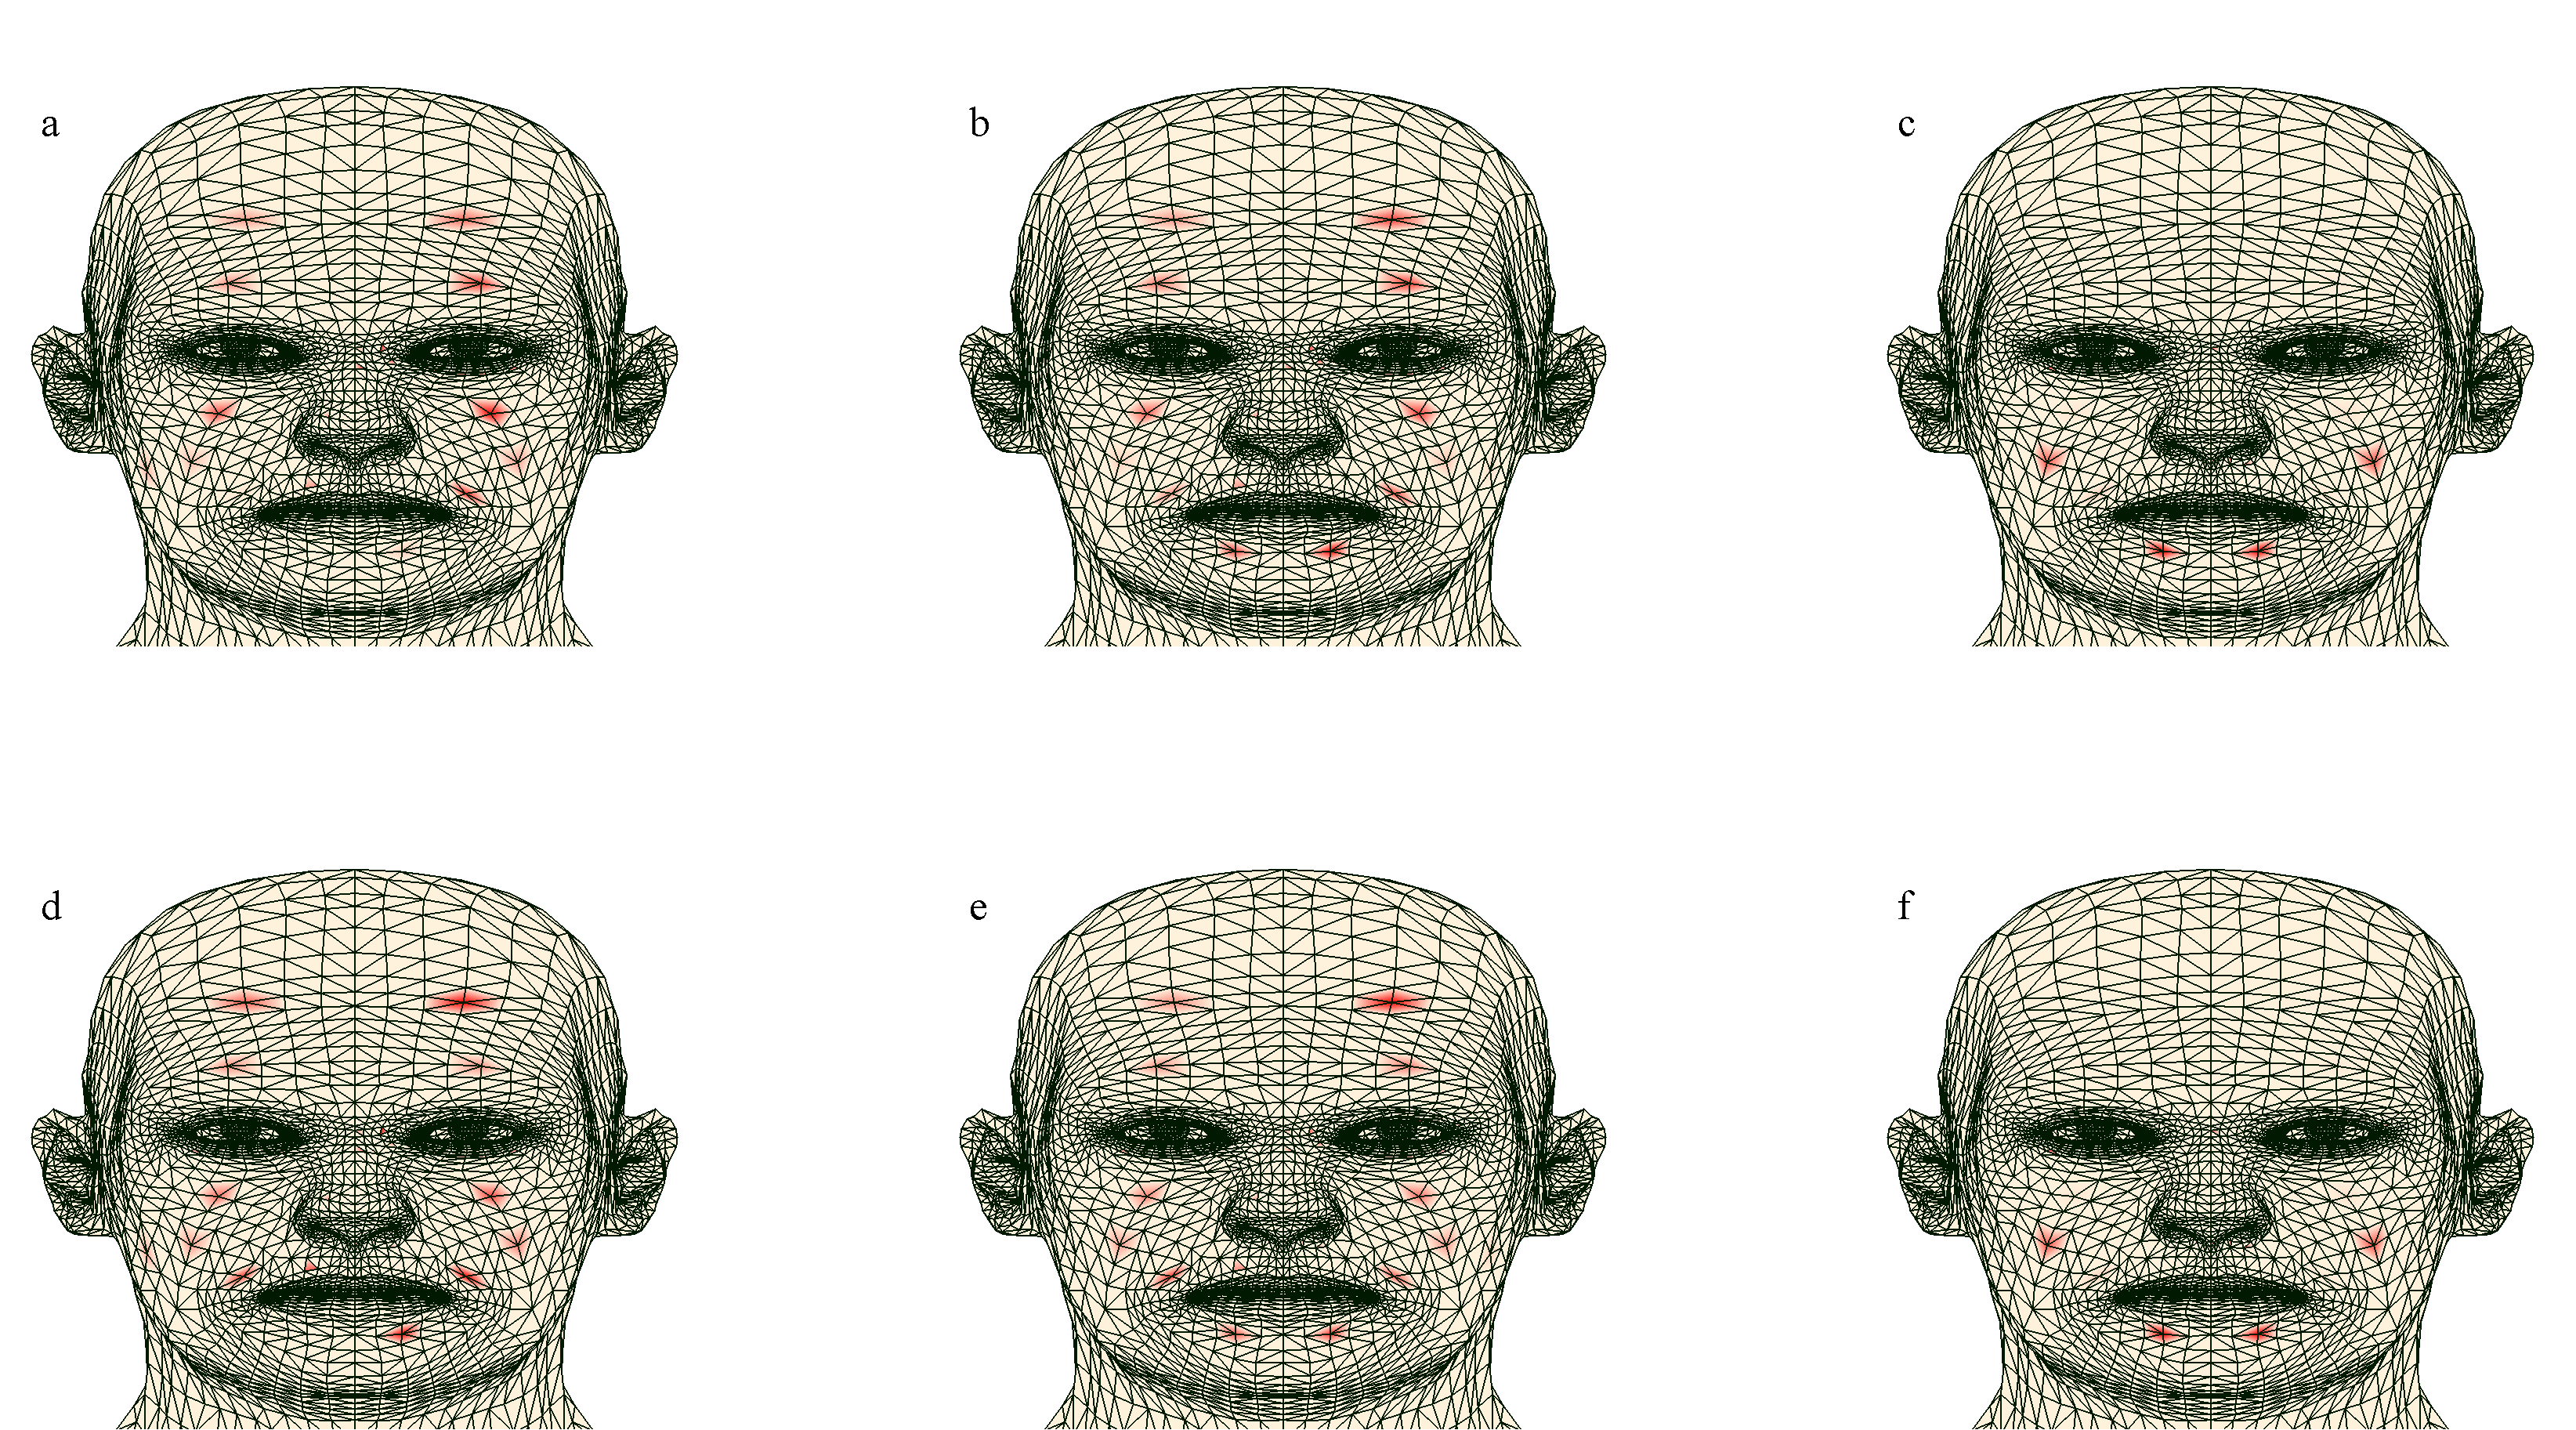


**Figure S5:** Facial muscle activity representations based on the FuzzyEn method for the outer brow raising facial movement. A) Estimated muscle activities of patient A before rehabilitation. B) Estimated muscle activities of patient A after rehabilitation. C, F) Mean value of estimated muscle activities of ten healthy individuals. D) Estimated muscle activities of patient B before rehabilitation. E) Estimated muscle activities of patient B after rehabilitation.


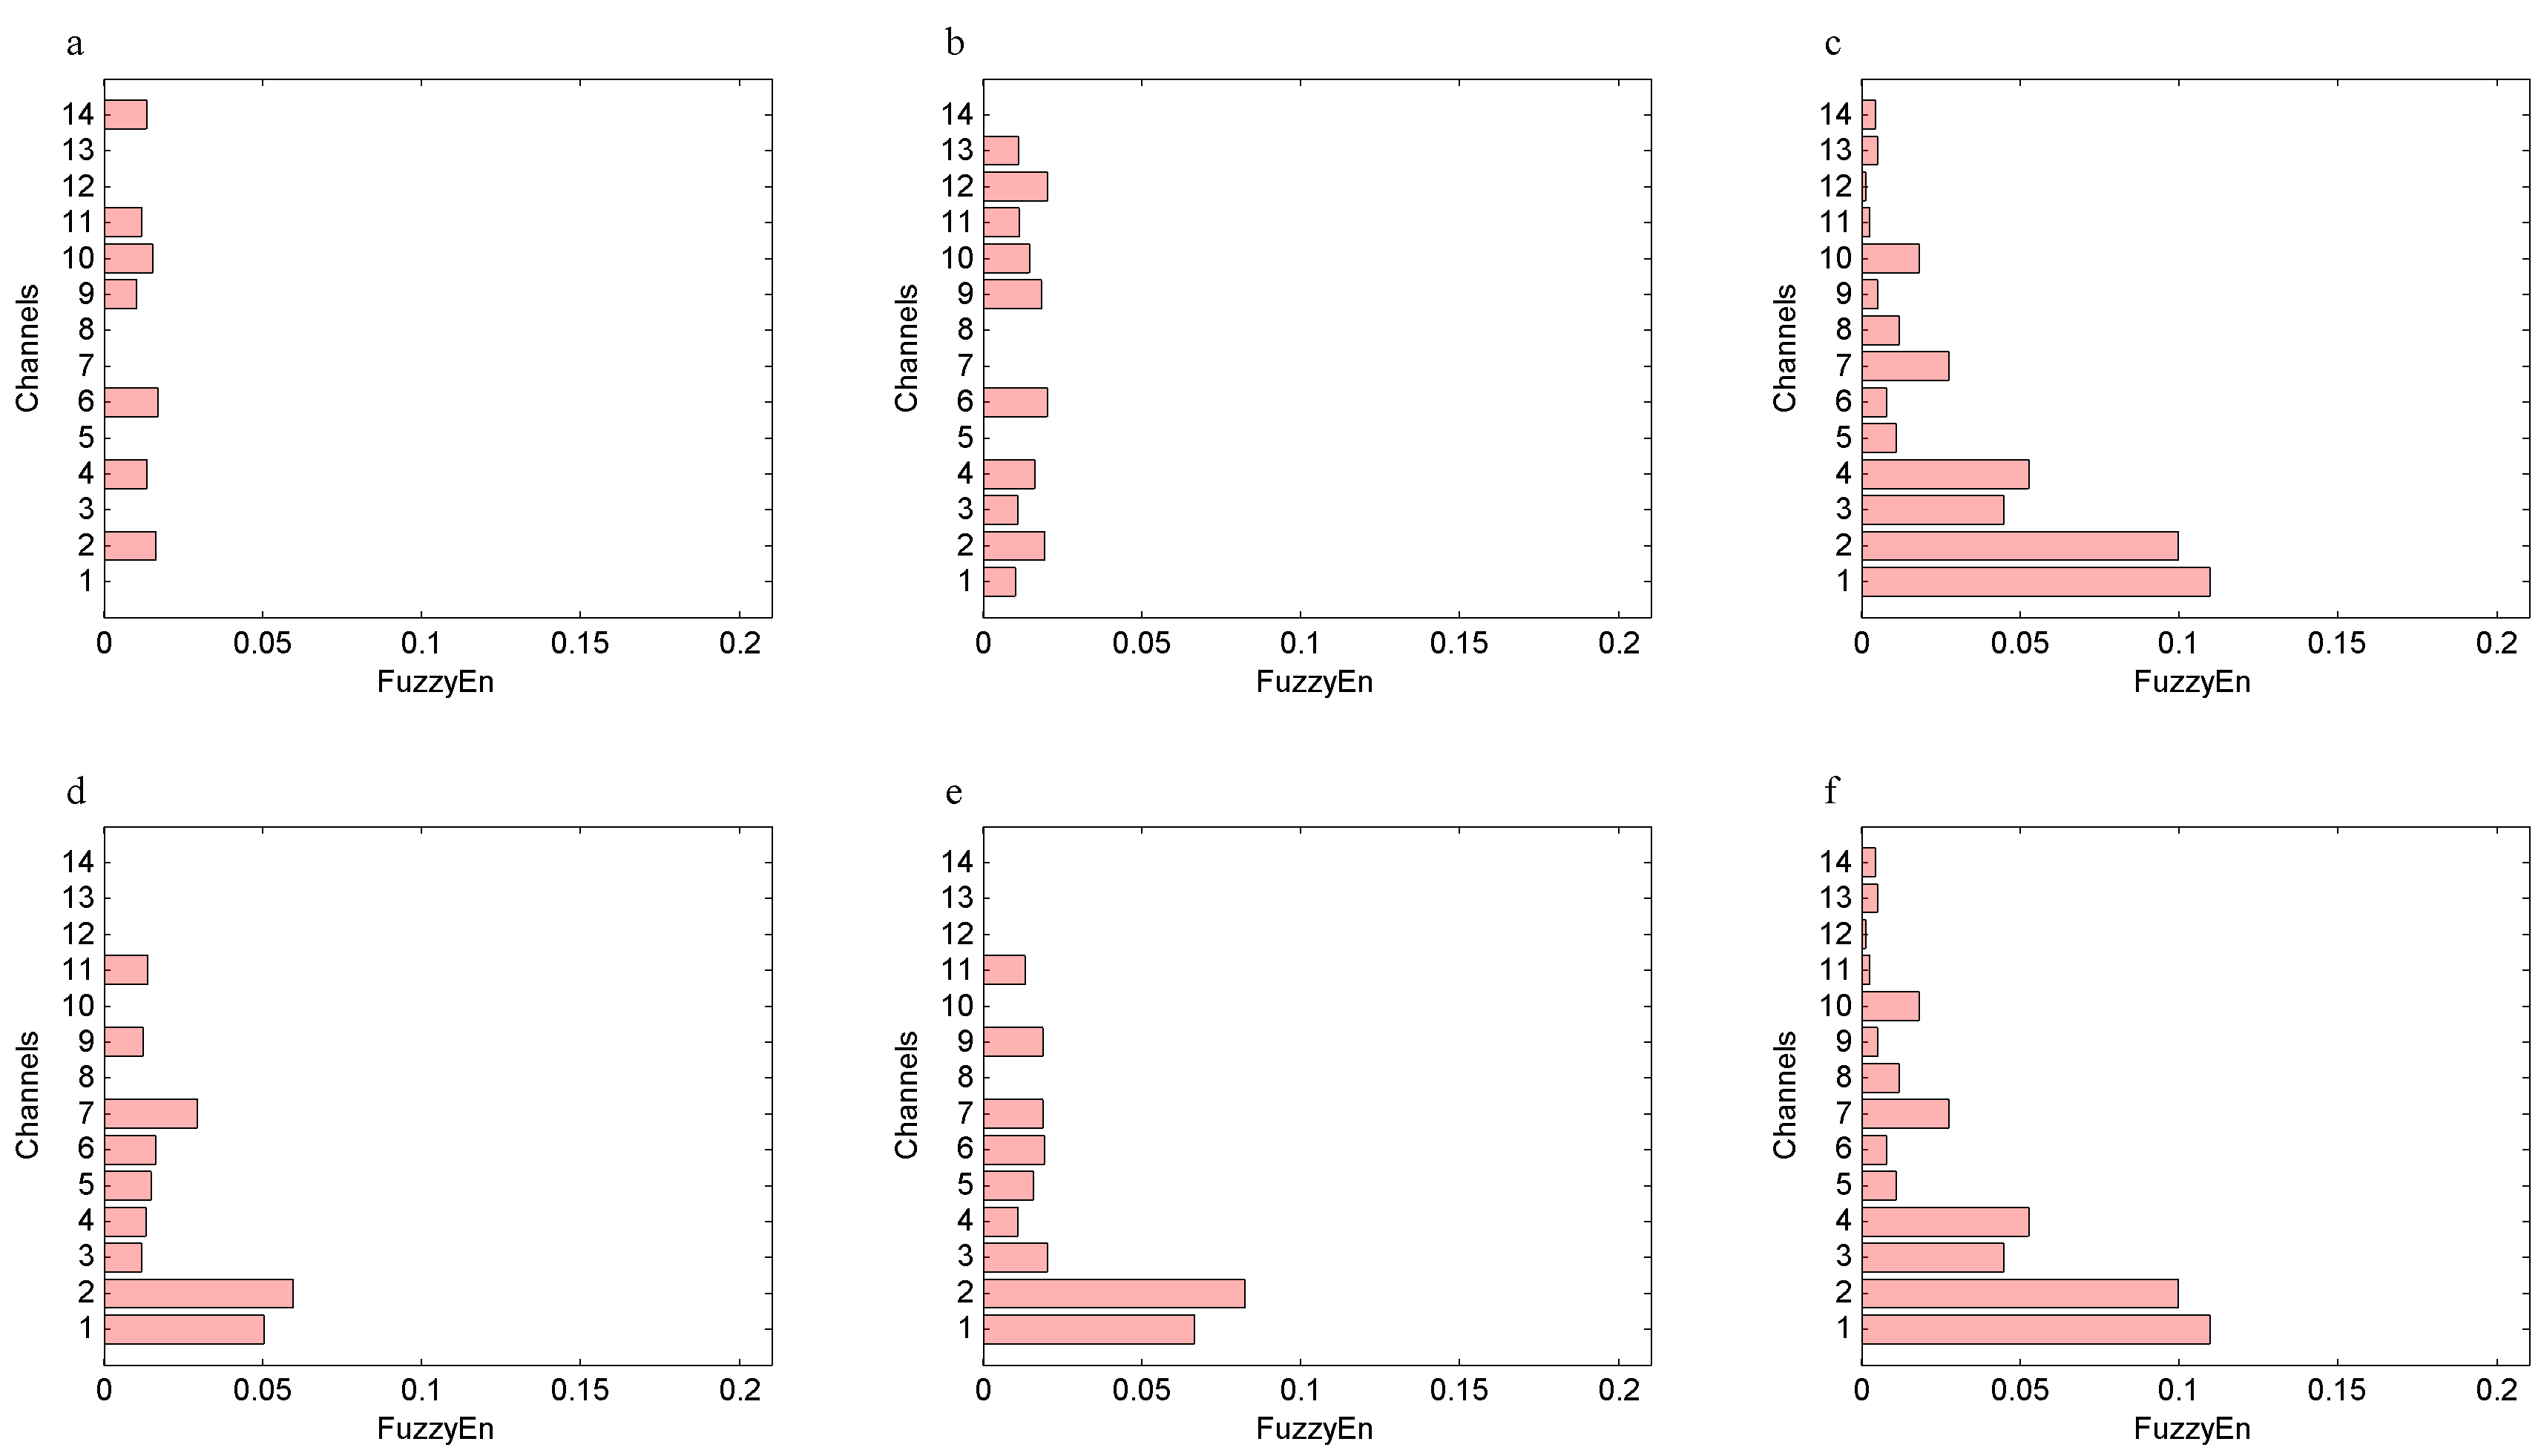


**Figure S6:** Facial muscle activity representations on a 3D face model based on the FuzzyEn method for the outer brow raising facial movement. A) Estimated muscle activities of patient A before rehabilitation. B) Estimated muscle activities of patient A after rehabilitation. C, F) Mean value of estimated muscle activities of ten healthy individuals. D) Estimated muscle activities of patient B before rehabilitation. E) Estimated muscle activities of patient B after rehabilitation.


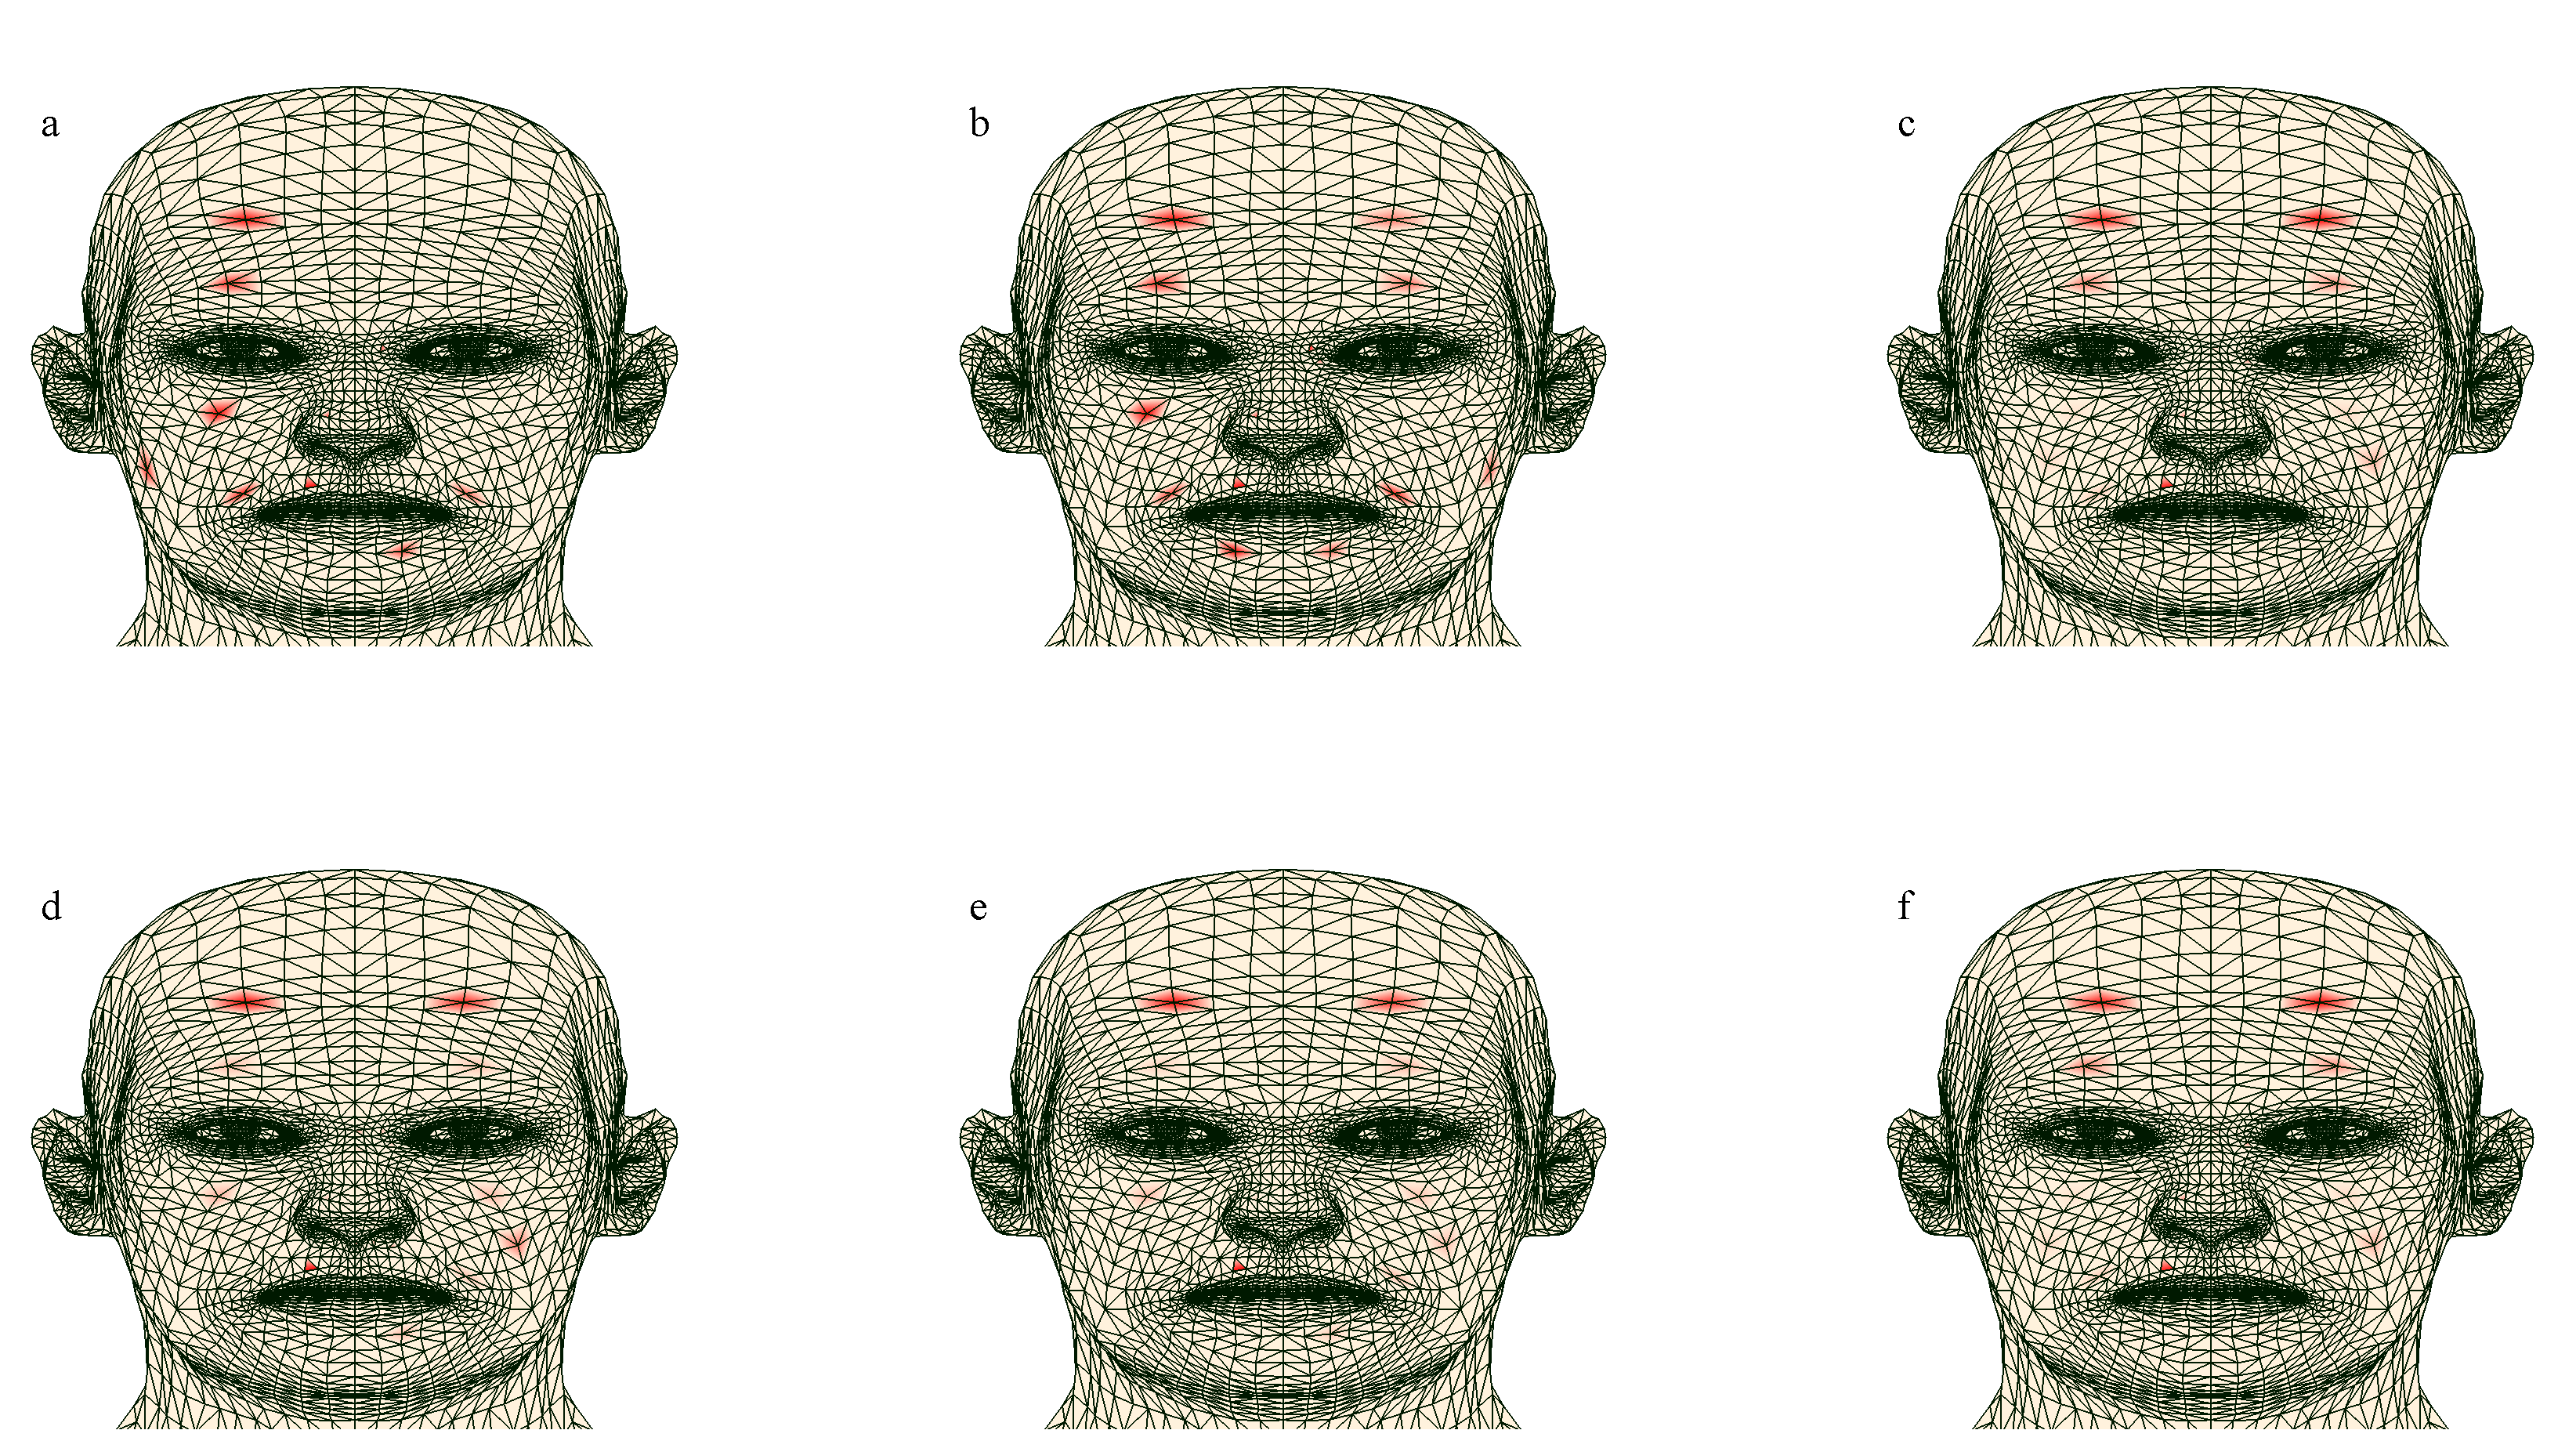


**Figure S7:** Facial muscle activity representations based on the FuzzyEn method for the anger facial expression. A) Estimated muscle activities of patient A before rehabilitation. B) Estimated muscle activities of patient A after rehabilitation. C, F) Mean value of estimated muscle activities of ten healthy individuals. D) Estimated muscle activities of patient B before rehabilitation. E) Estimated muscle activities of patient B after rehabilitation.


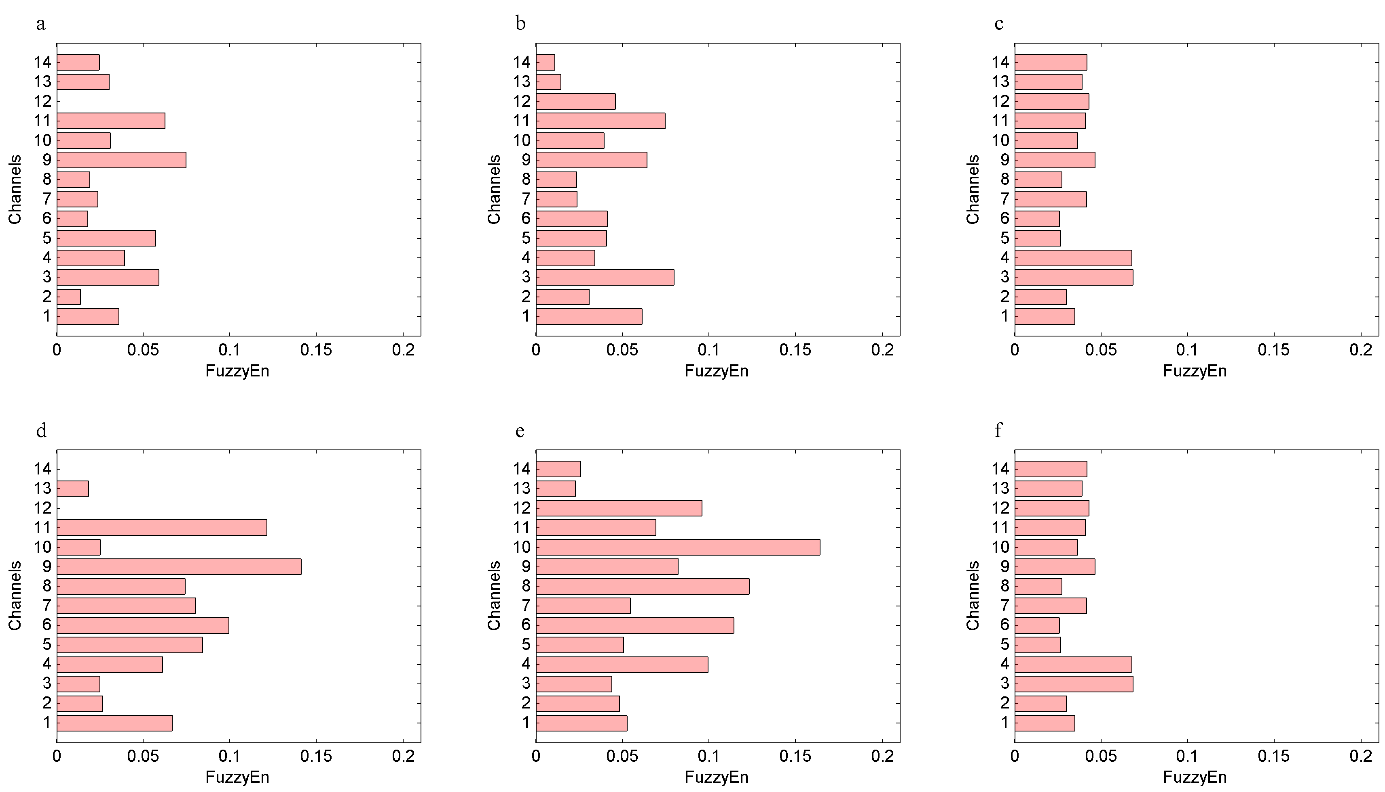


**Figure S8:** Facial muscle activity representations on a 3D face model based on the FuzzyEn method for the anger facial expression. A) Estimated muscle activities of patient A before rehabilitation. B) Estimated muscle activities of patient A after rehabilitation. C, F) Mean value of estimated muscle activities of ten healthy individuals. D) Estimated muscle activities of patient B before rehabilitation. E) Estimated muscle activities of patient B after rehabilitation.


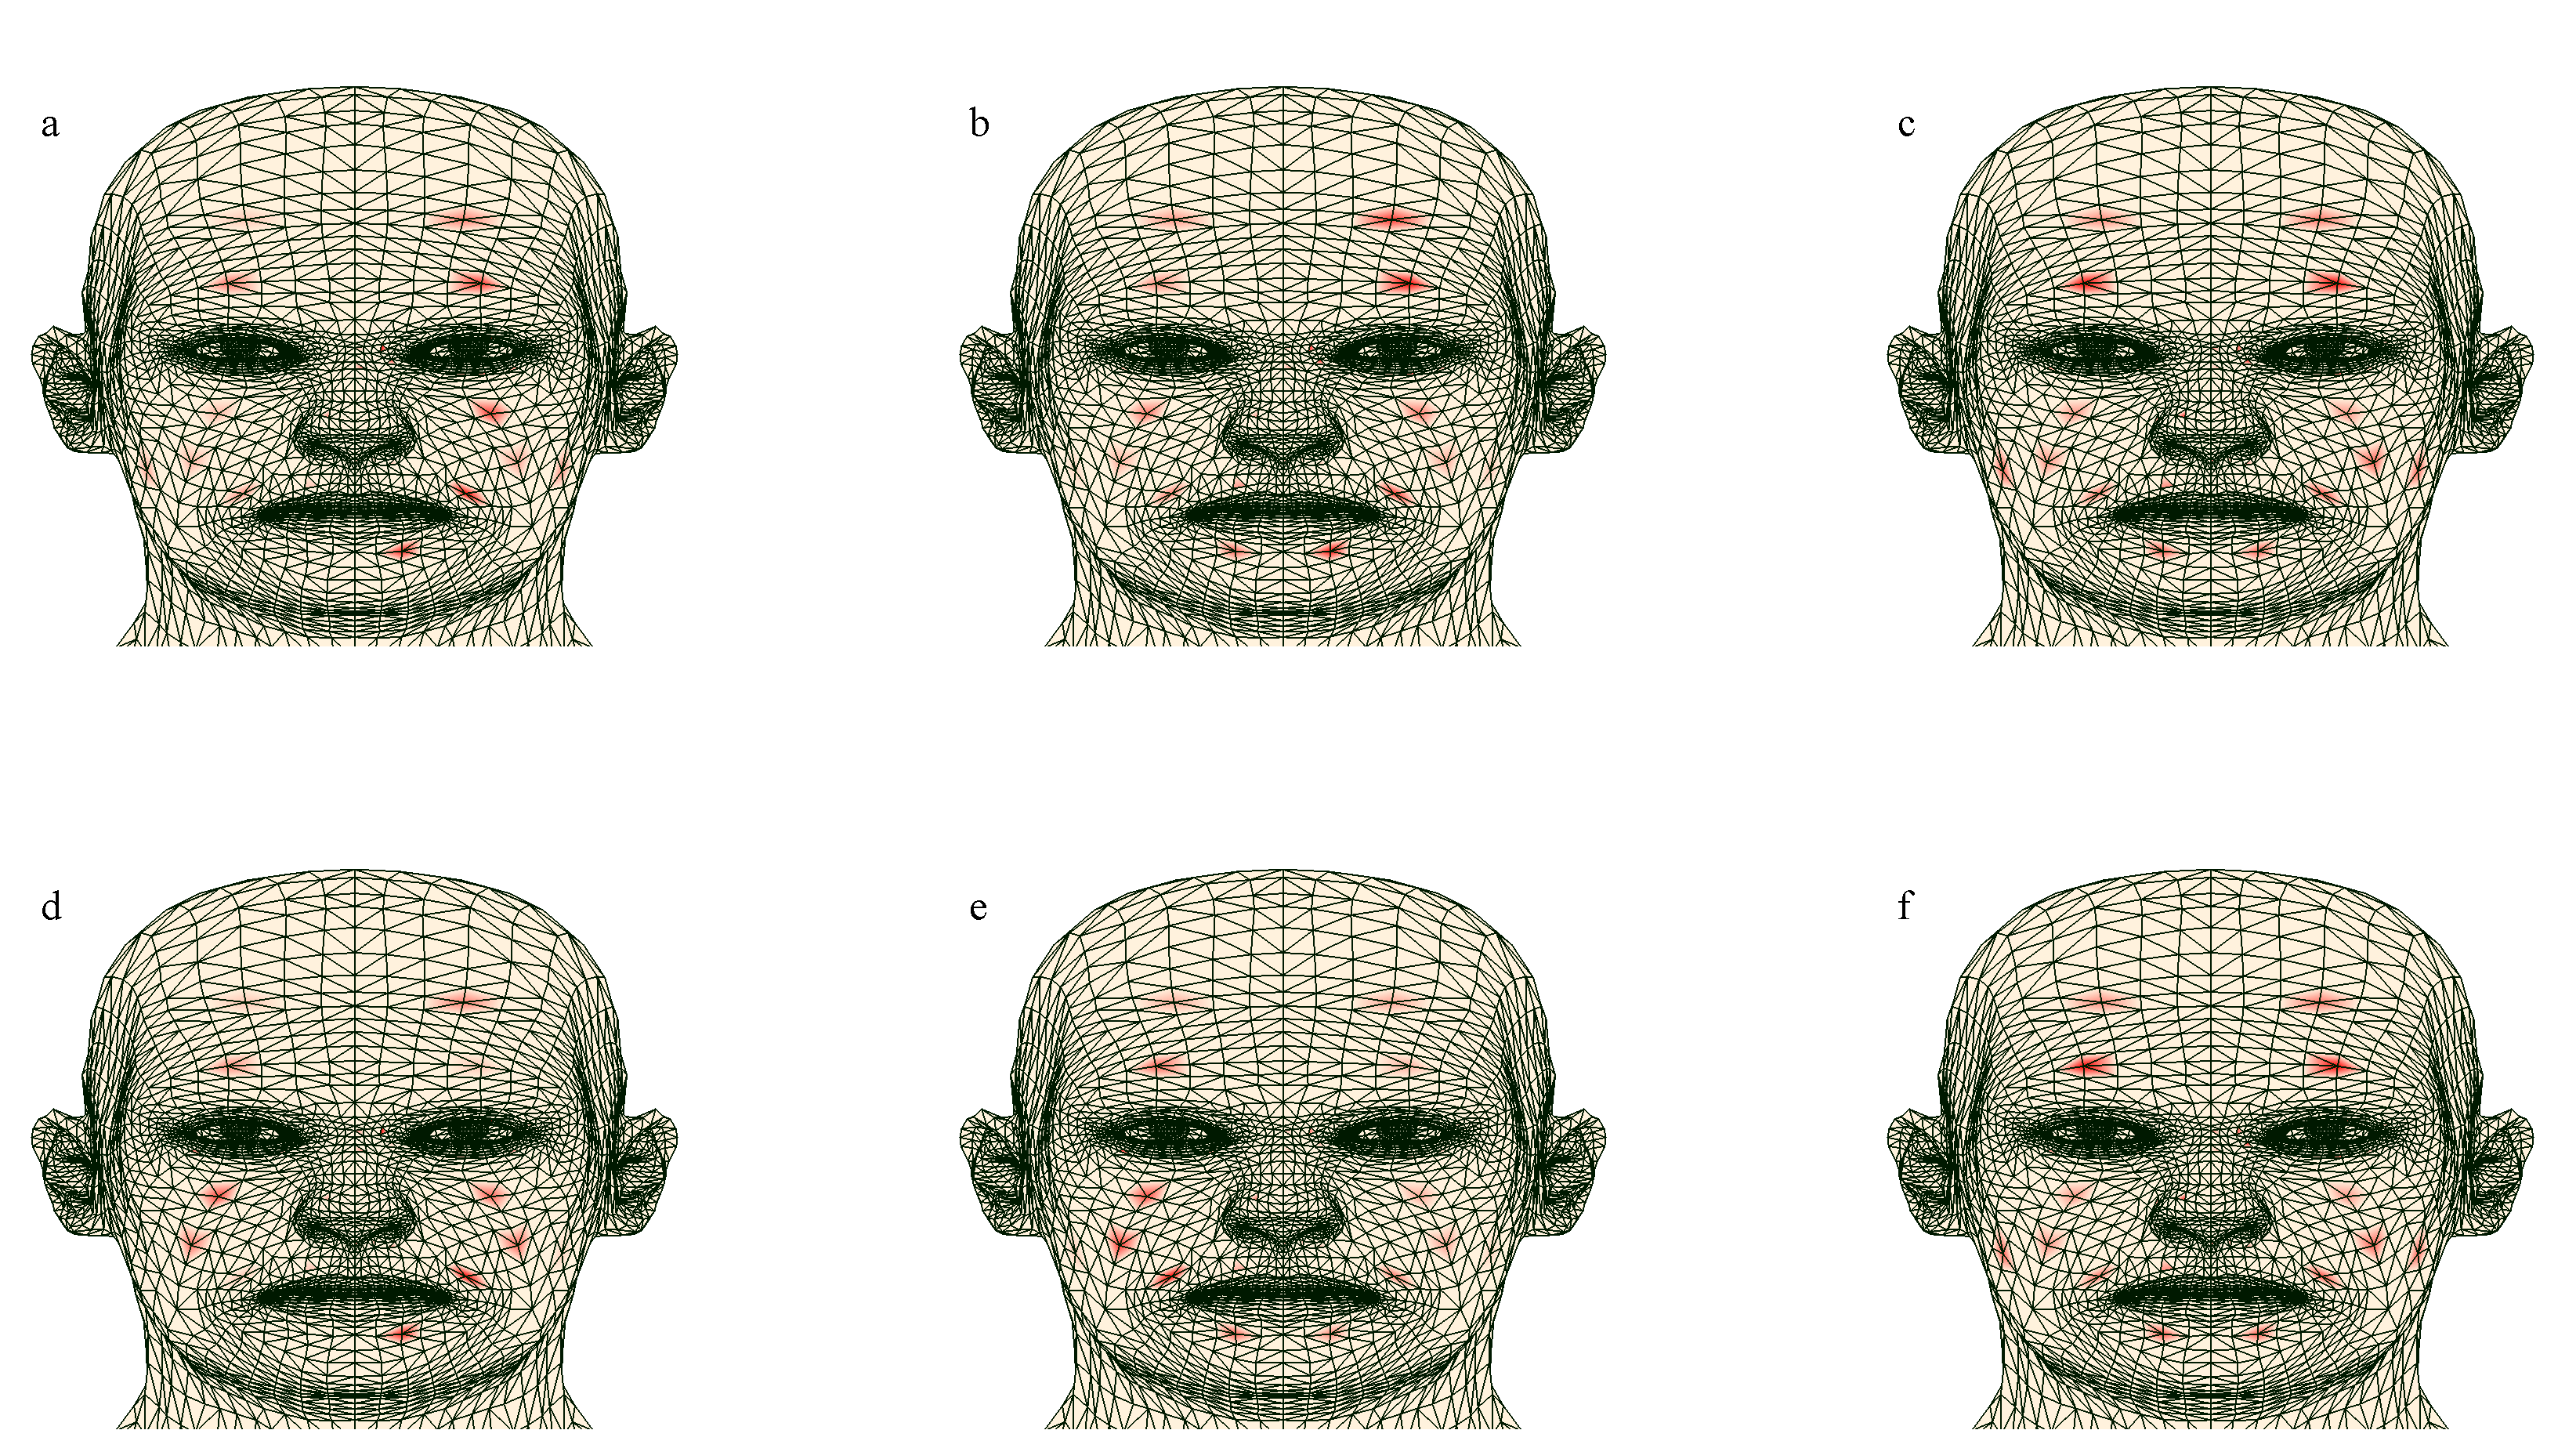


**Figure S9:** Facial muscle activity representations based on the FuzzyEn method for the fear facial expression. A) Estimated muscle activities of patient A before rehabilitation. B) Estimated muscle activities of patient A after rehabilitation. C, F) Mean value of estimated muscle activities of ten healthy individuals. D) Estimated muscle activities of patient B before rehabilitation. E) Estimated muscle activities of patient B after rehabilitation.


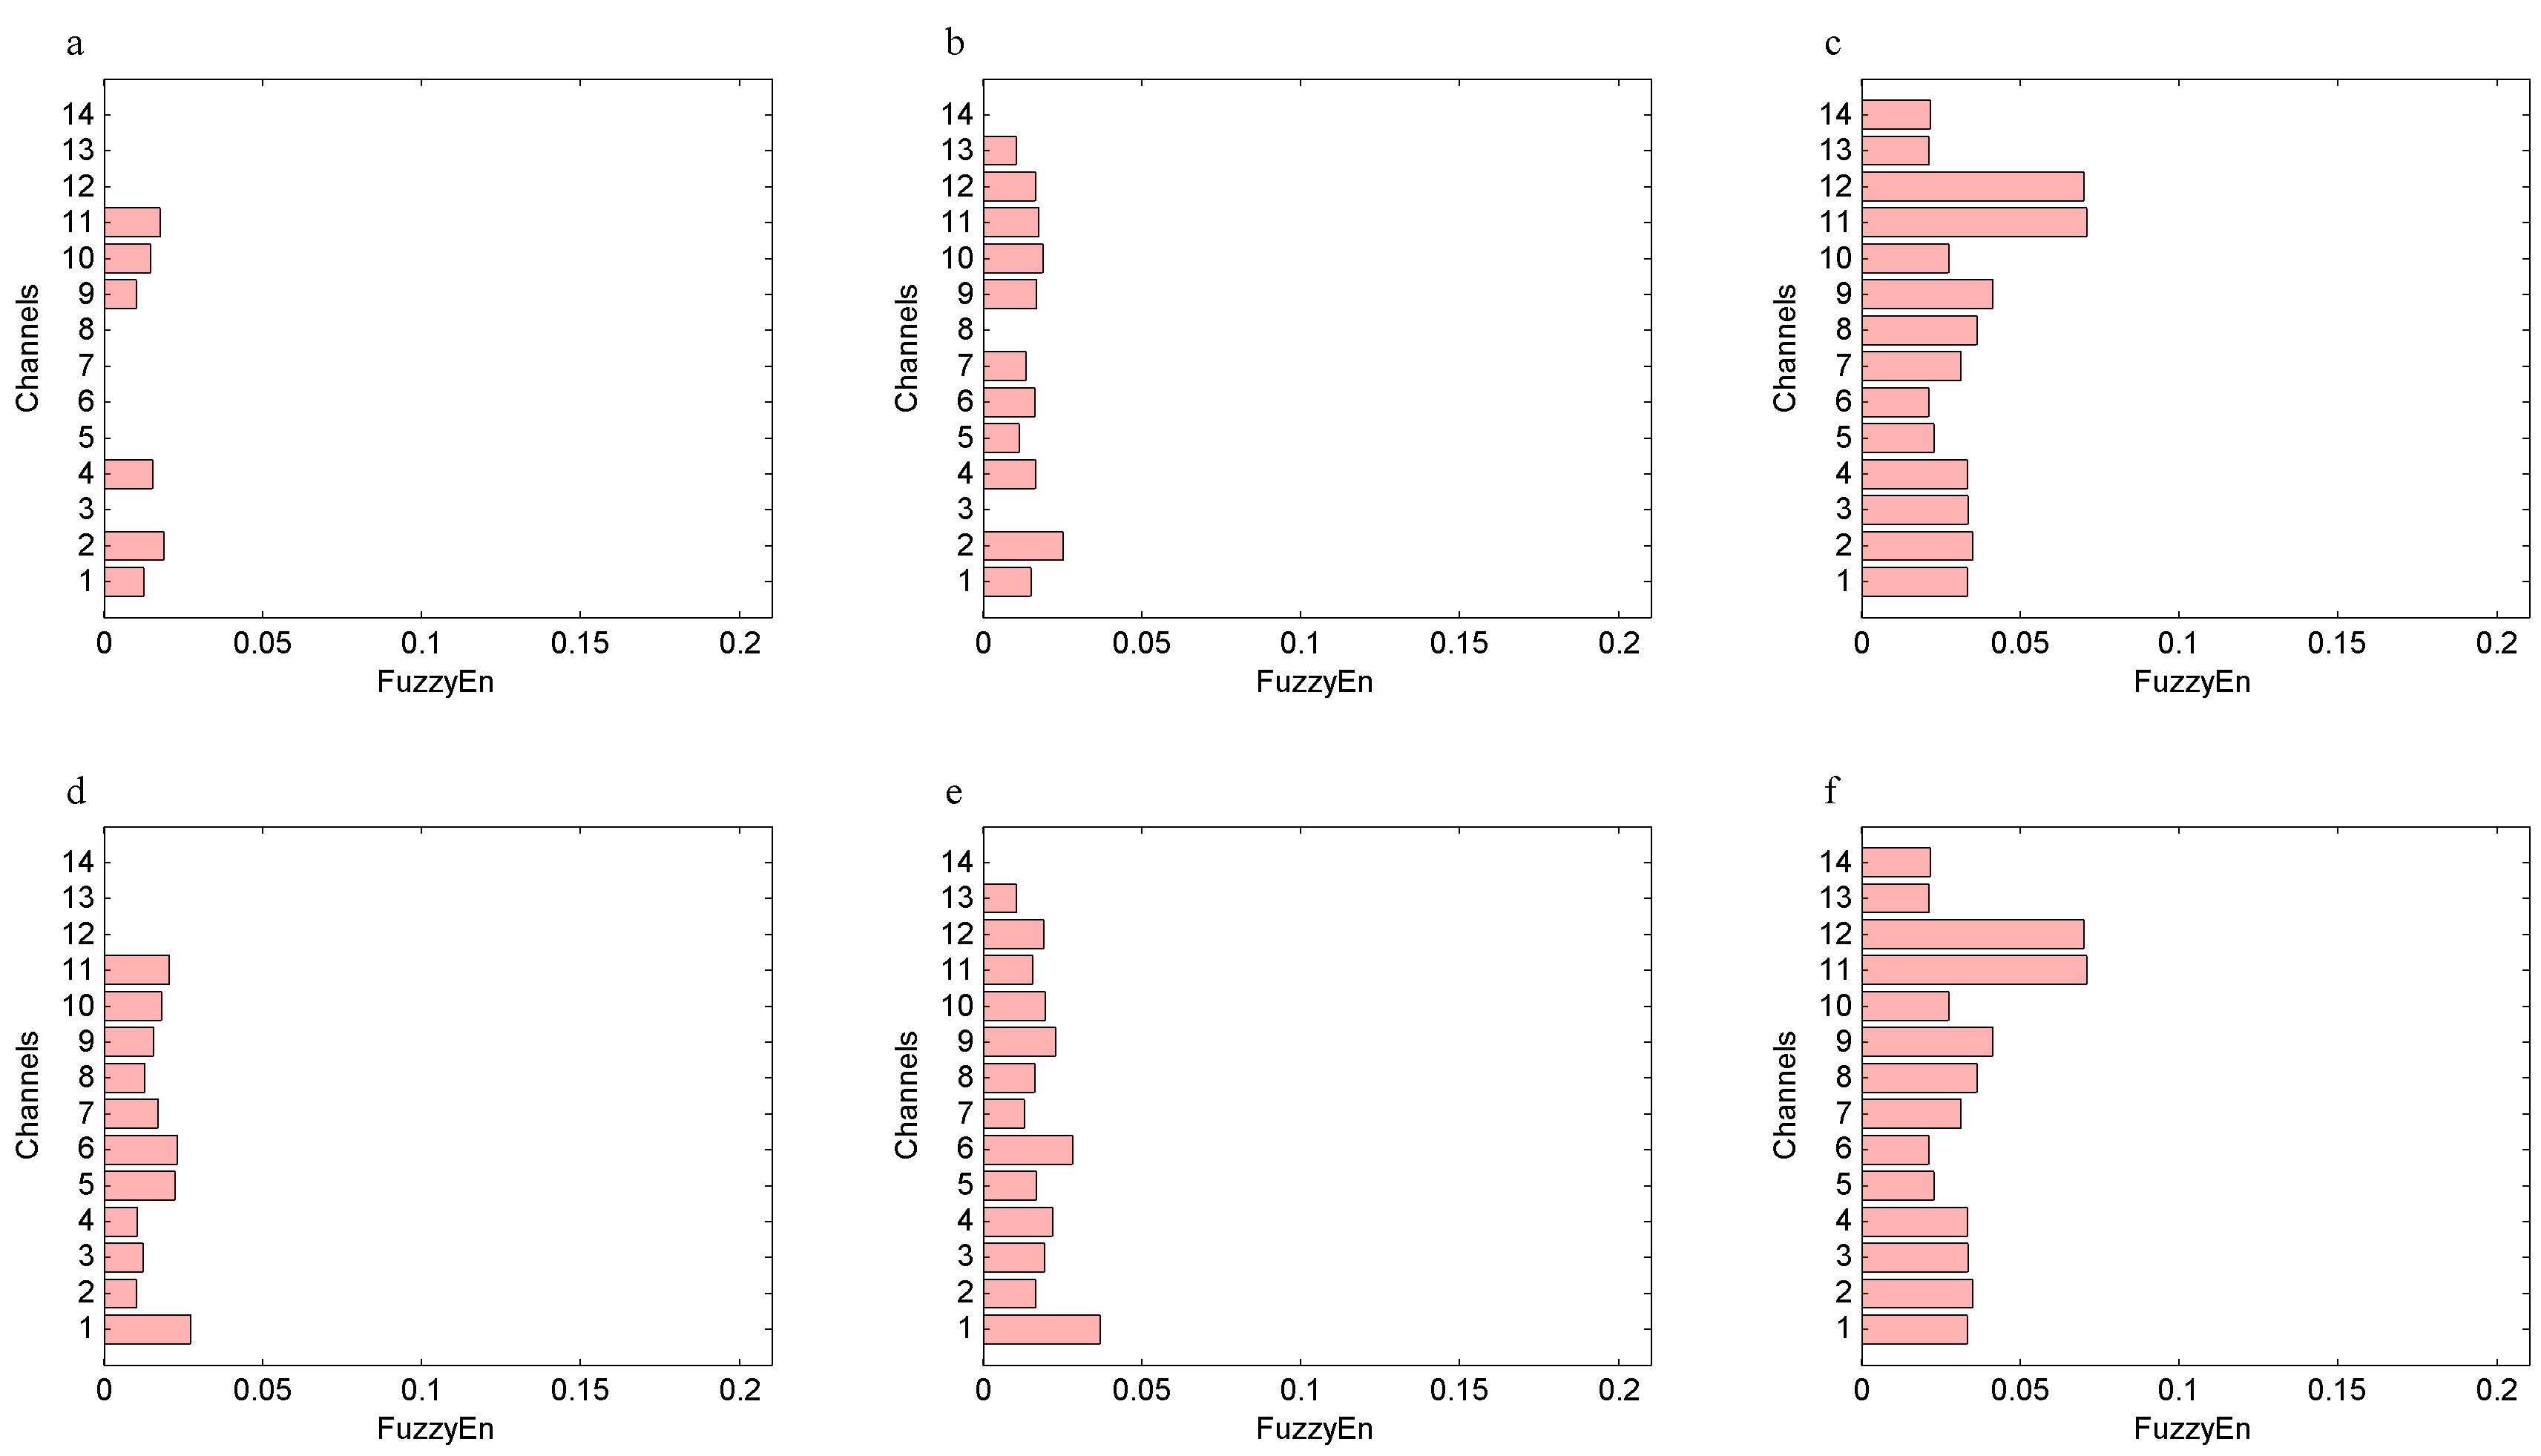


**Figure S10:** Facial muscle activity representations on a 3D face model based on the FuzzyEn method for the fear facial expression. A) Estimated muscle activities of patient A before rehabilitation. B) Estimated muscle activities of patient A after rehabilitation. C, F) Mean value of estimated muscle activities of ten healthy individuals. D) Estimated muscle activities of patient B before rehabilitation. E) Estimated muscle activities of patient B after rehabilitation.


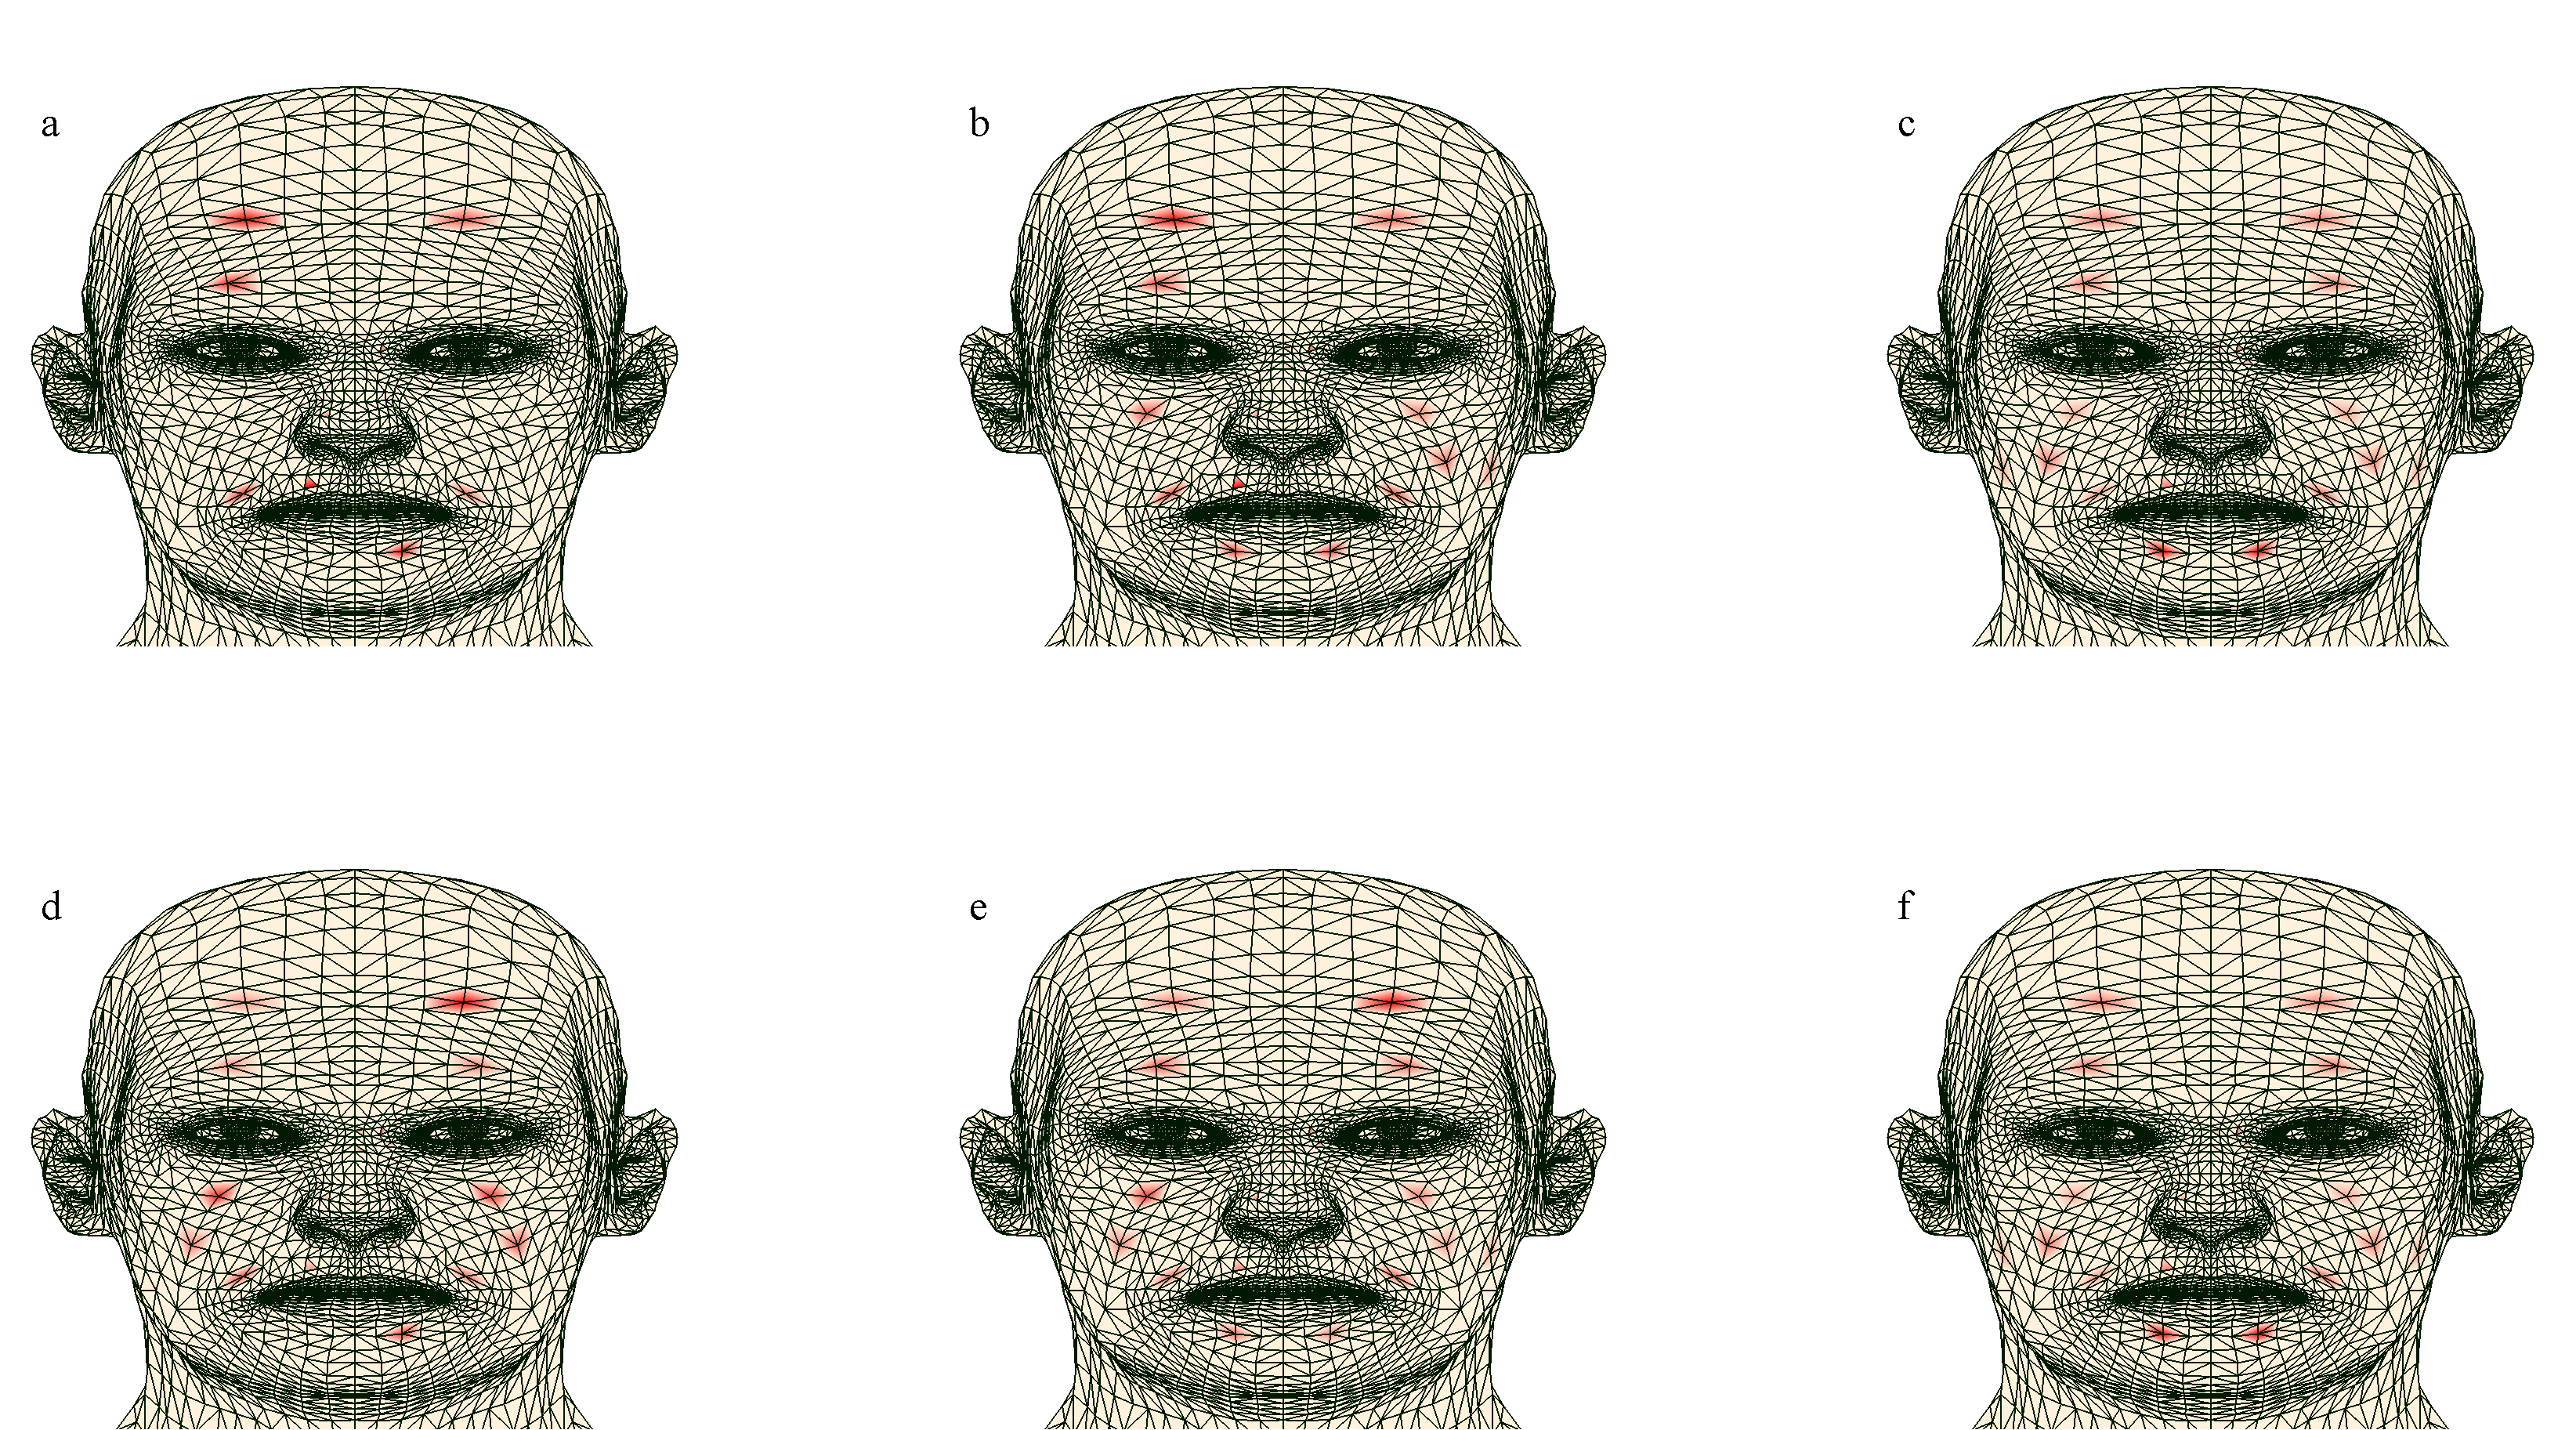


**Figure S11:** Facial muscle activity representations based on the FuzzyEn method for the happiness facial expression. A) Estimated muscle activities of patient A before rehabilitation. B) Estimated muscle activities of patient A after rehabilitation. C, F) Mean value of estimated muscle activities of ten healthy individuals. D) Estimated muscle activities of patient B before rehabilitation. E) Estimated muscle activities of patient B after rehabilitation.


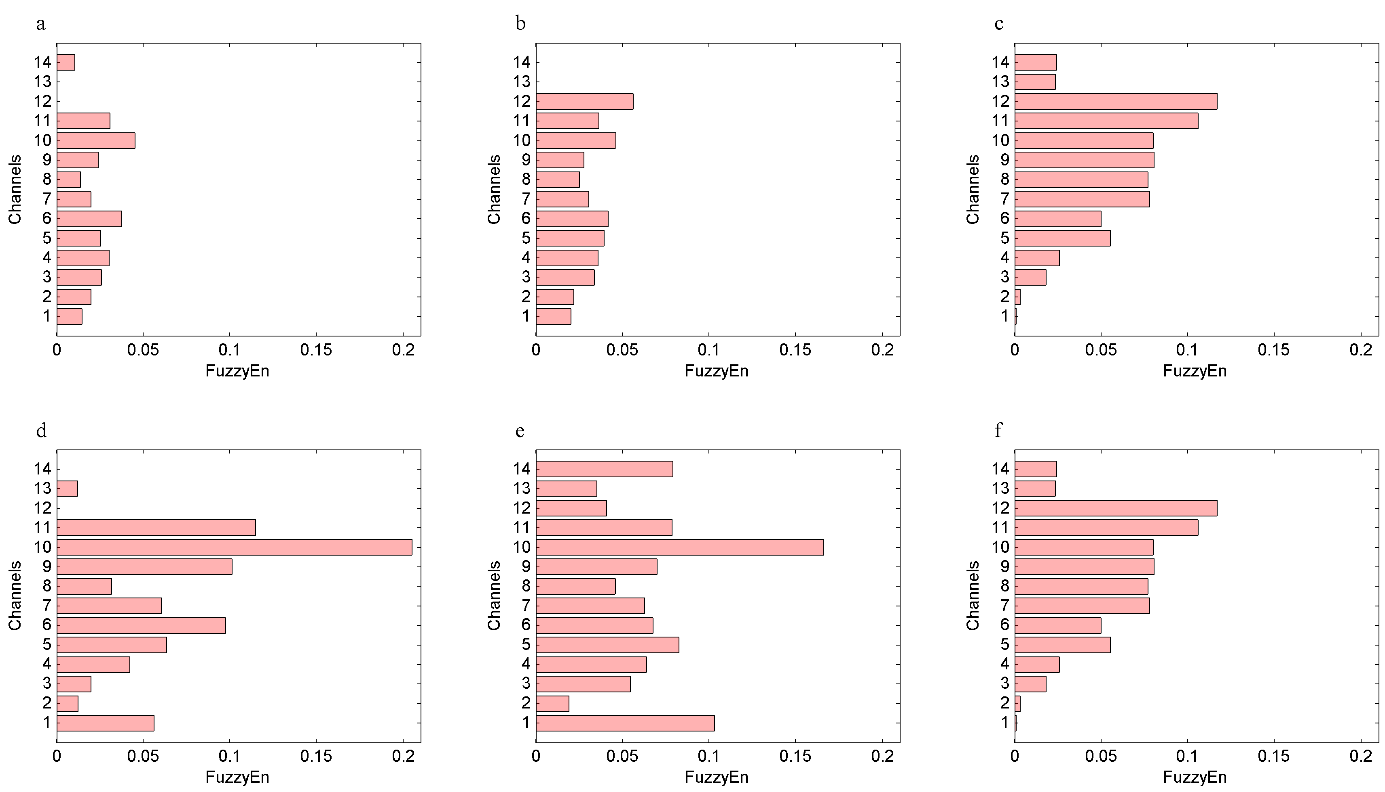


**Figure S12:** Facial muscle activity representations based on the FuzzyEn method for the hate/disgust facial expression. A) Estimated muscle activities of patient A before rehabilitation. B) Estimated muscle activities of patient A after rehabilitation. C, F) Mean value of estimated muscle activities of ten healthy individuals. D) Estimated muscle activities of patient B before rehabilitation. E) Estimated muscle activities of patient B after rehabilitation.


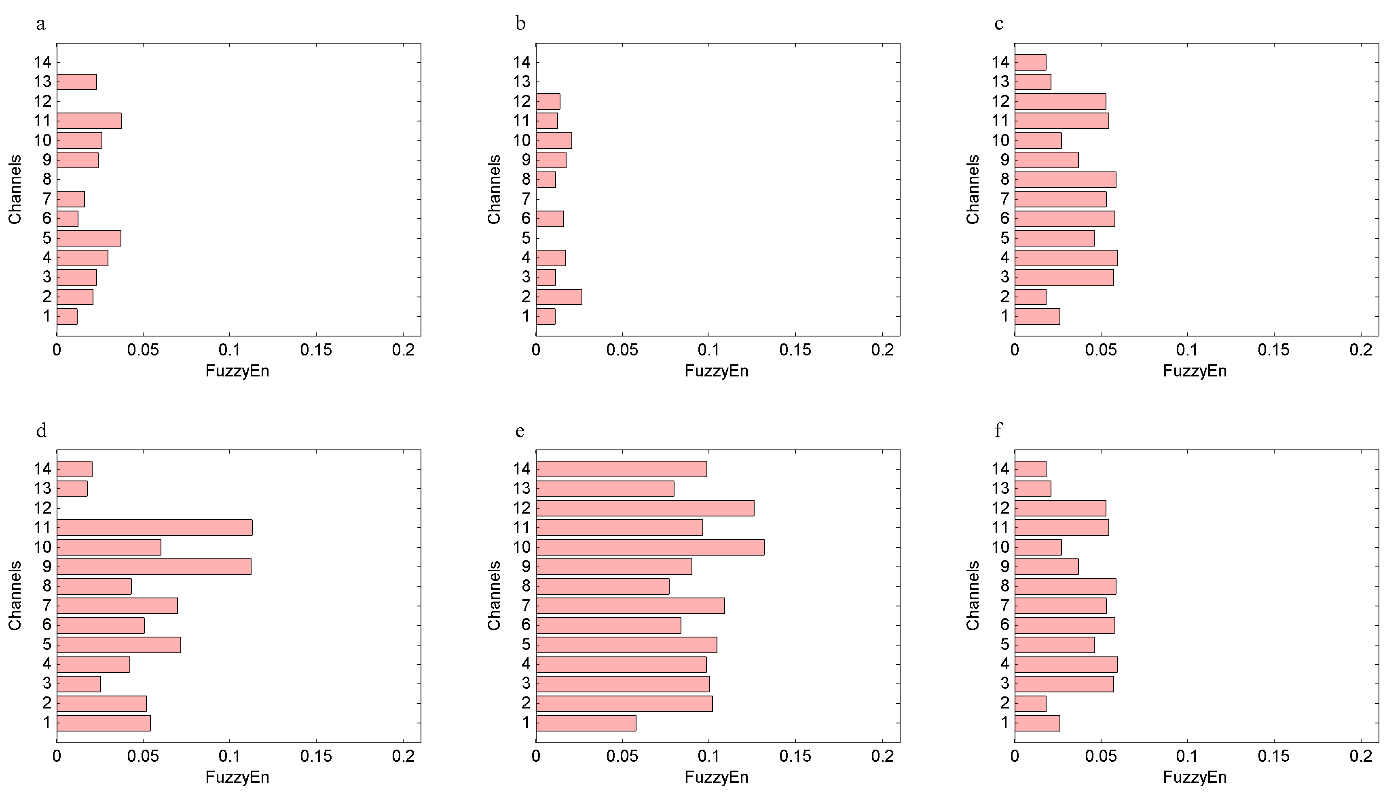


**Figure S13:** Facial muscle activity representations on a 3D face model based on the FuzzyEn method for the hate/disgust facial expression. A) Estimated muscle activities of patient A before rehabilitation. B) Estimated muscle activities of patient A after rehabilitation. C, F) Mean value of estimated muscle activities of ten healthy individuals. D) Estimated muscle activities of patient B before rehabilitation. E) Estimated muscle activities of patient B after rehabilitation.


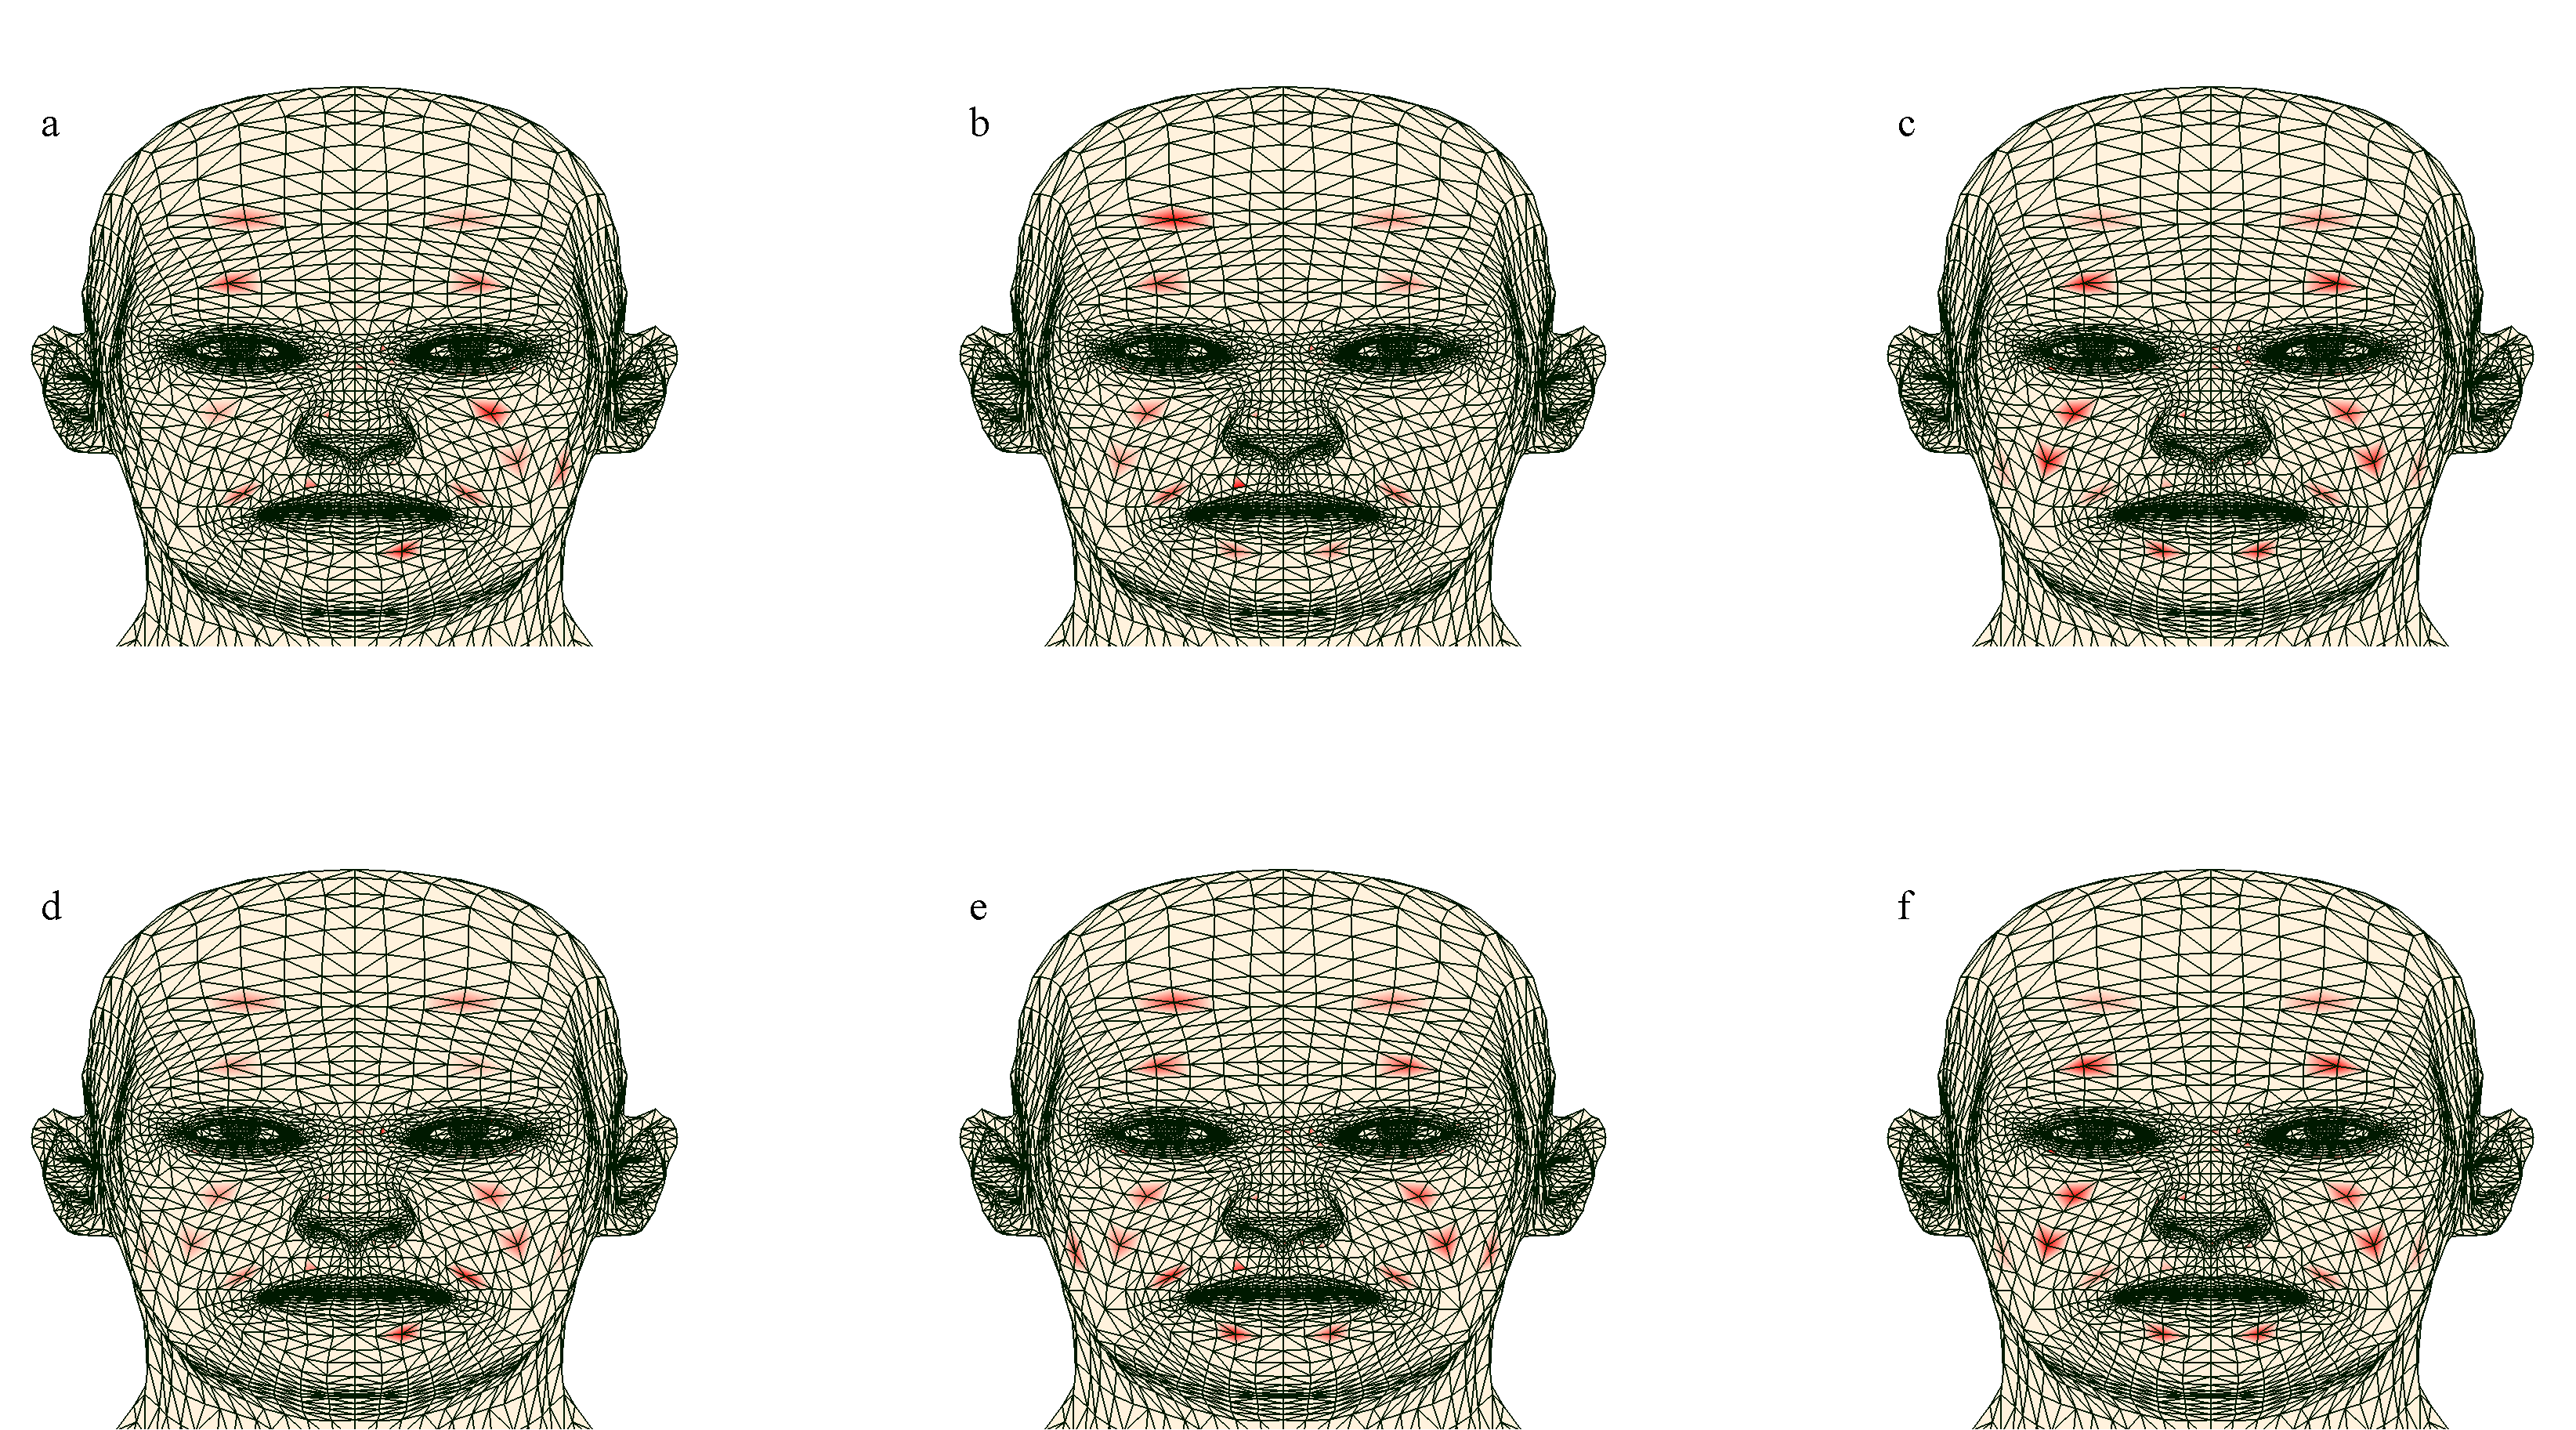


**Figure S14:** Facial muscle activity representations based on the FuzzyEn method for the sadness facial expression. A) Estimated muscle activities of patient A before rehabilitation. B) Estimated muscle activities of patient A after rehabilitation. C, F) Mean value of estimated muscle activities of ten healthy individuals. D) Estimated muscle activities of patient B before rehabilitation. E) Estimated muscle activities of patient B after rehabilitation.


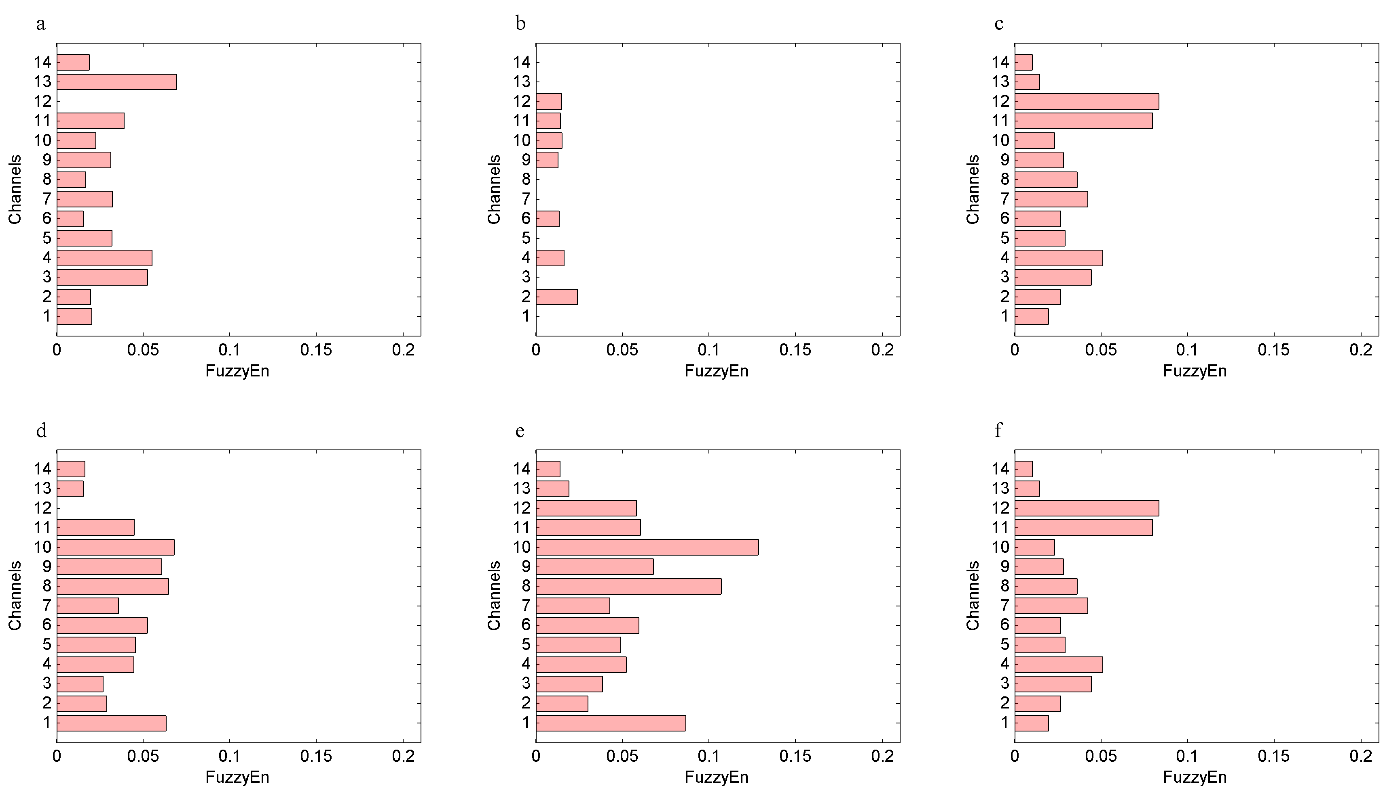


**Figure S15:** Facial muscle activity representations on a 3D face model based on the FuzzyEn method for the sadness facial expression. A) Estimated muscle activities of patient A before rehabilitation. B) Estimated muscle activities of patient A after rehabilitation. C, F) Mean value of estimated muscle activities of ten healthy individuals. D) Estimated muscle activities of patient B before rehabilitation. E) Estimated muscle activities of patient B after rehabilitation.


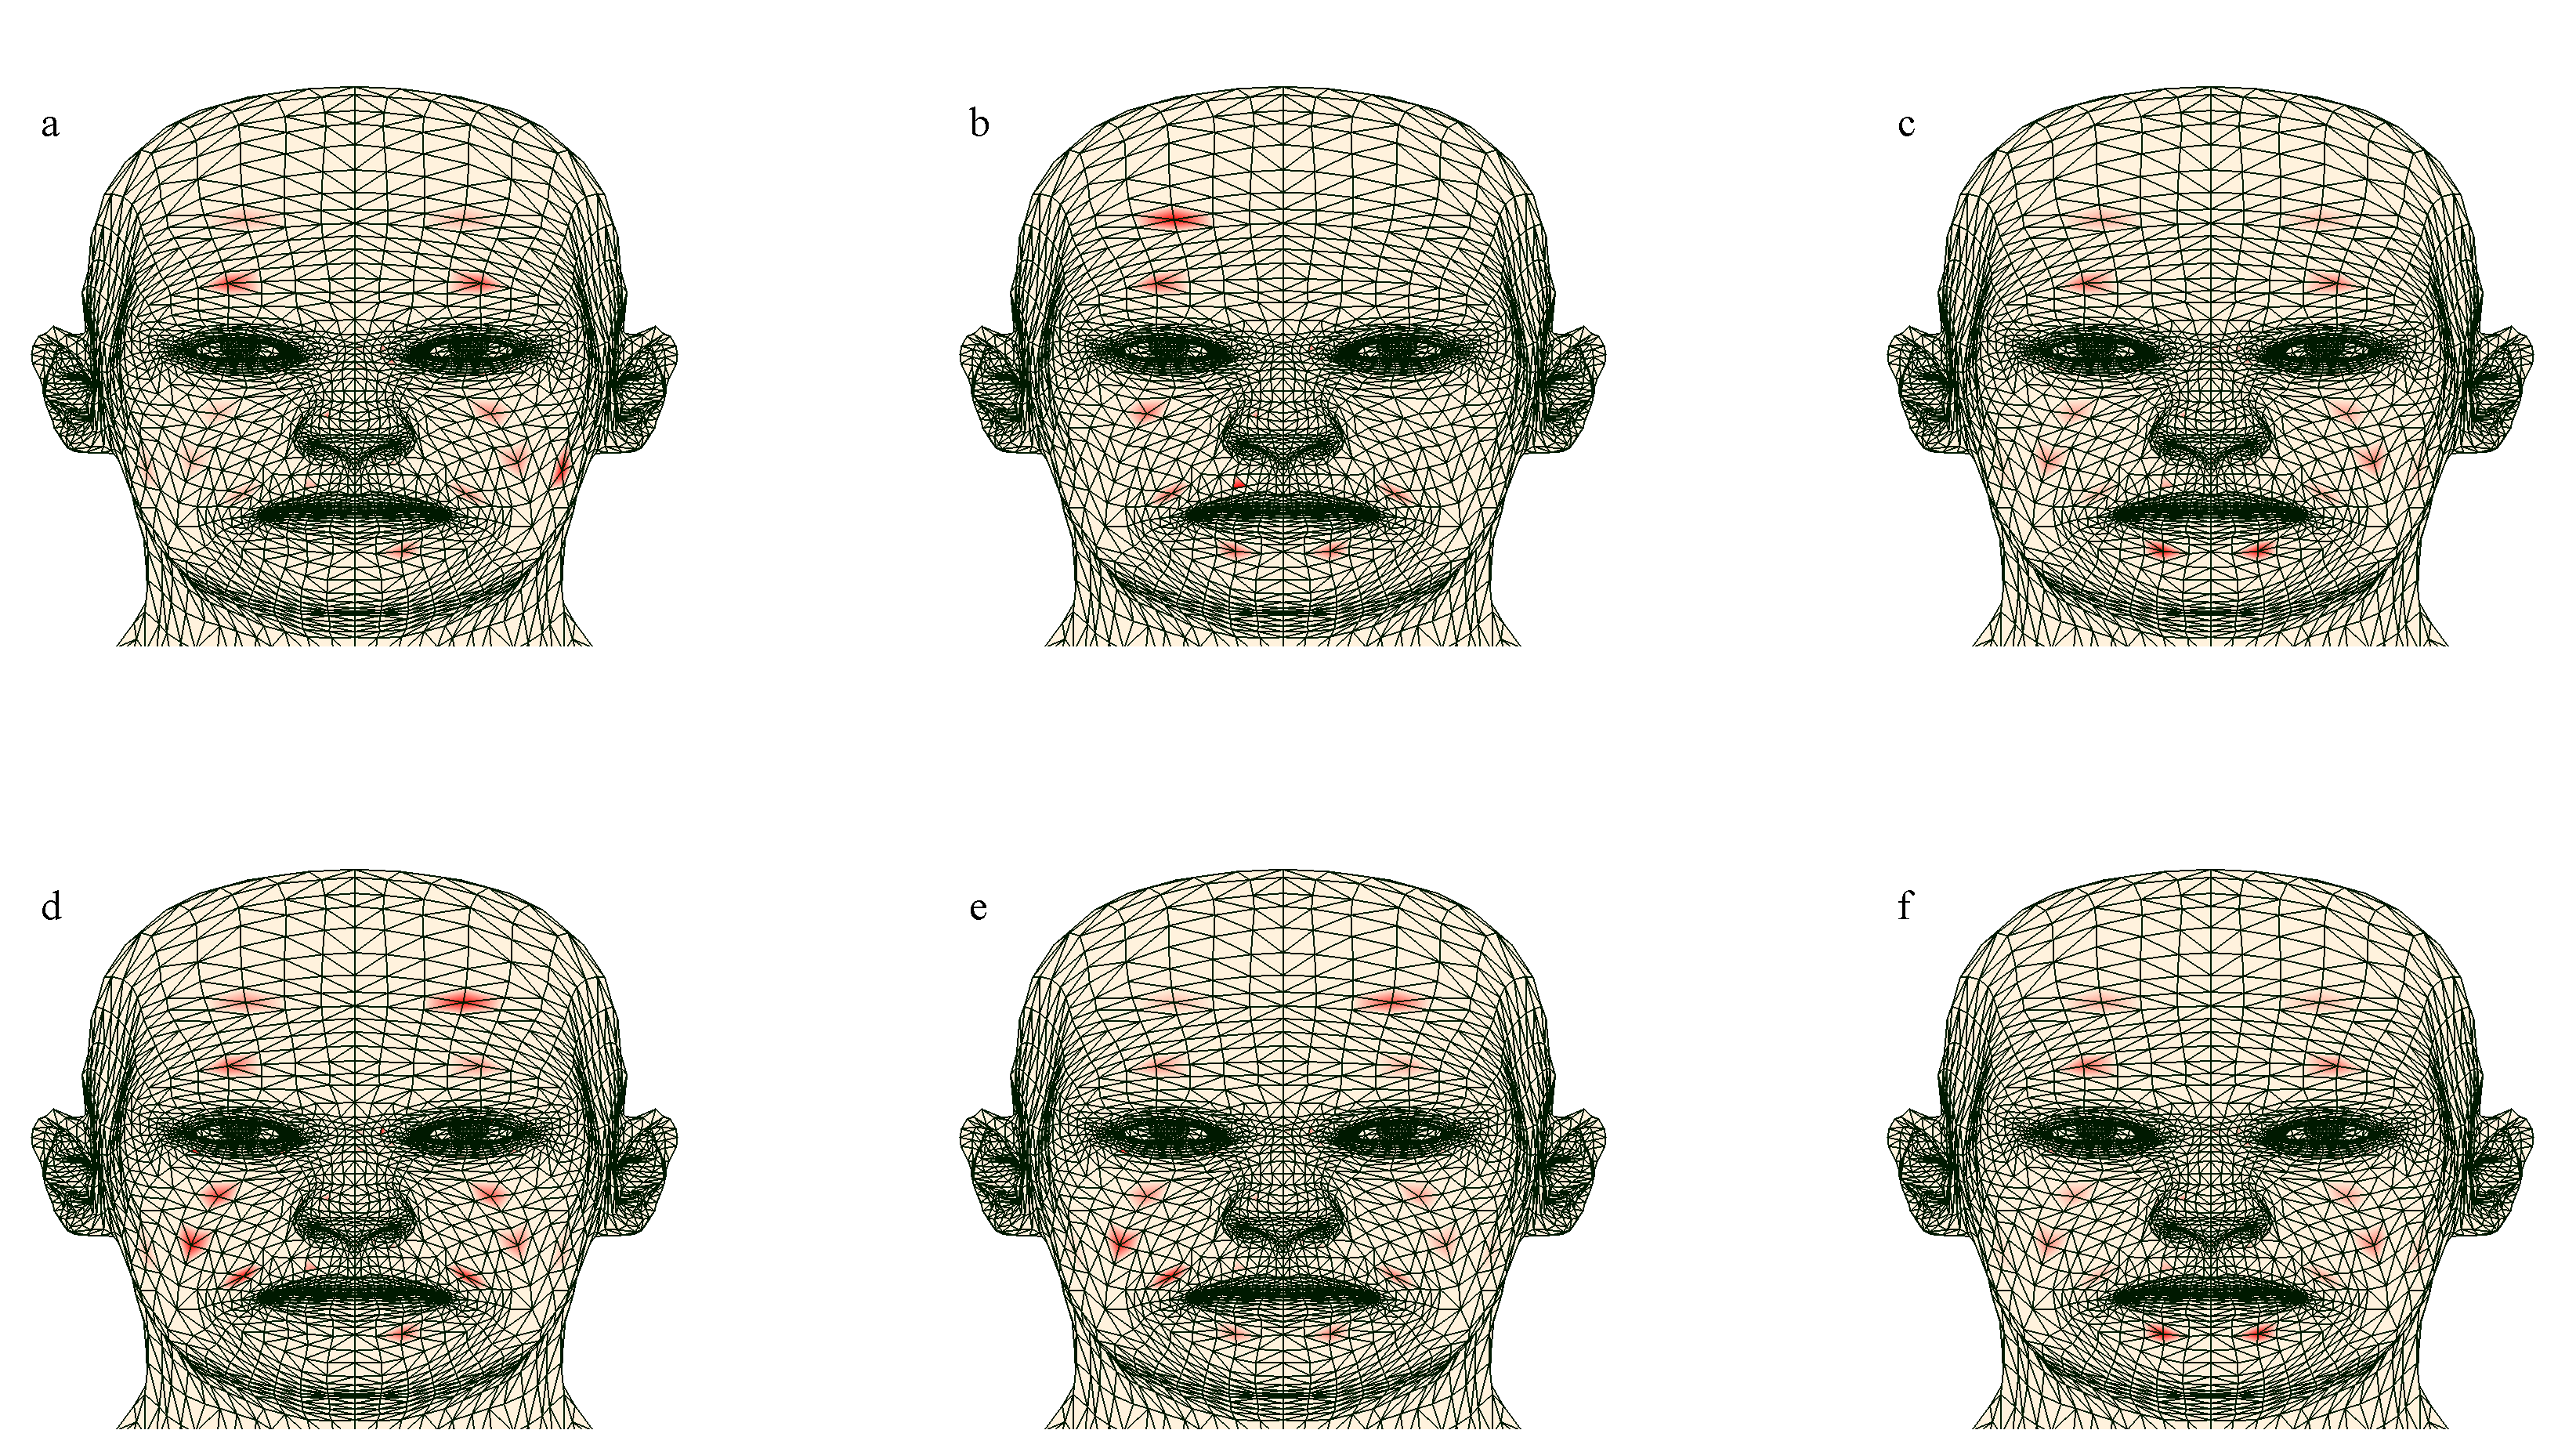


**Figure S16:** Facial muscle activity representations based on the FuzzyEn method for the surprised facial expression. A) Estimated muscle activities of patient A before rehabilitation. B) Estimated muscle activities of patient A after rehabilitation. C, F) Mean value of estimated muscle activities of ten healthy individuals. D) Estimated muscle activities of patient B before rehabilitation. E) Estimated muscle activities of patient B after rehabilitation.


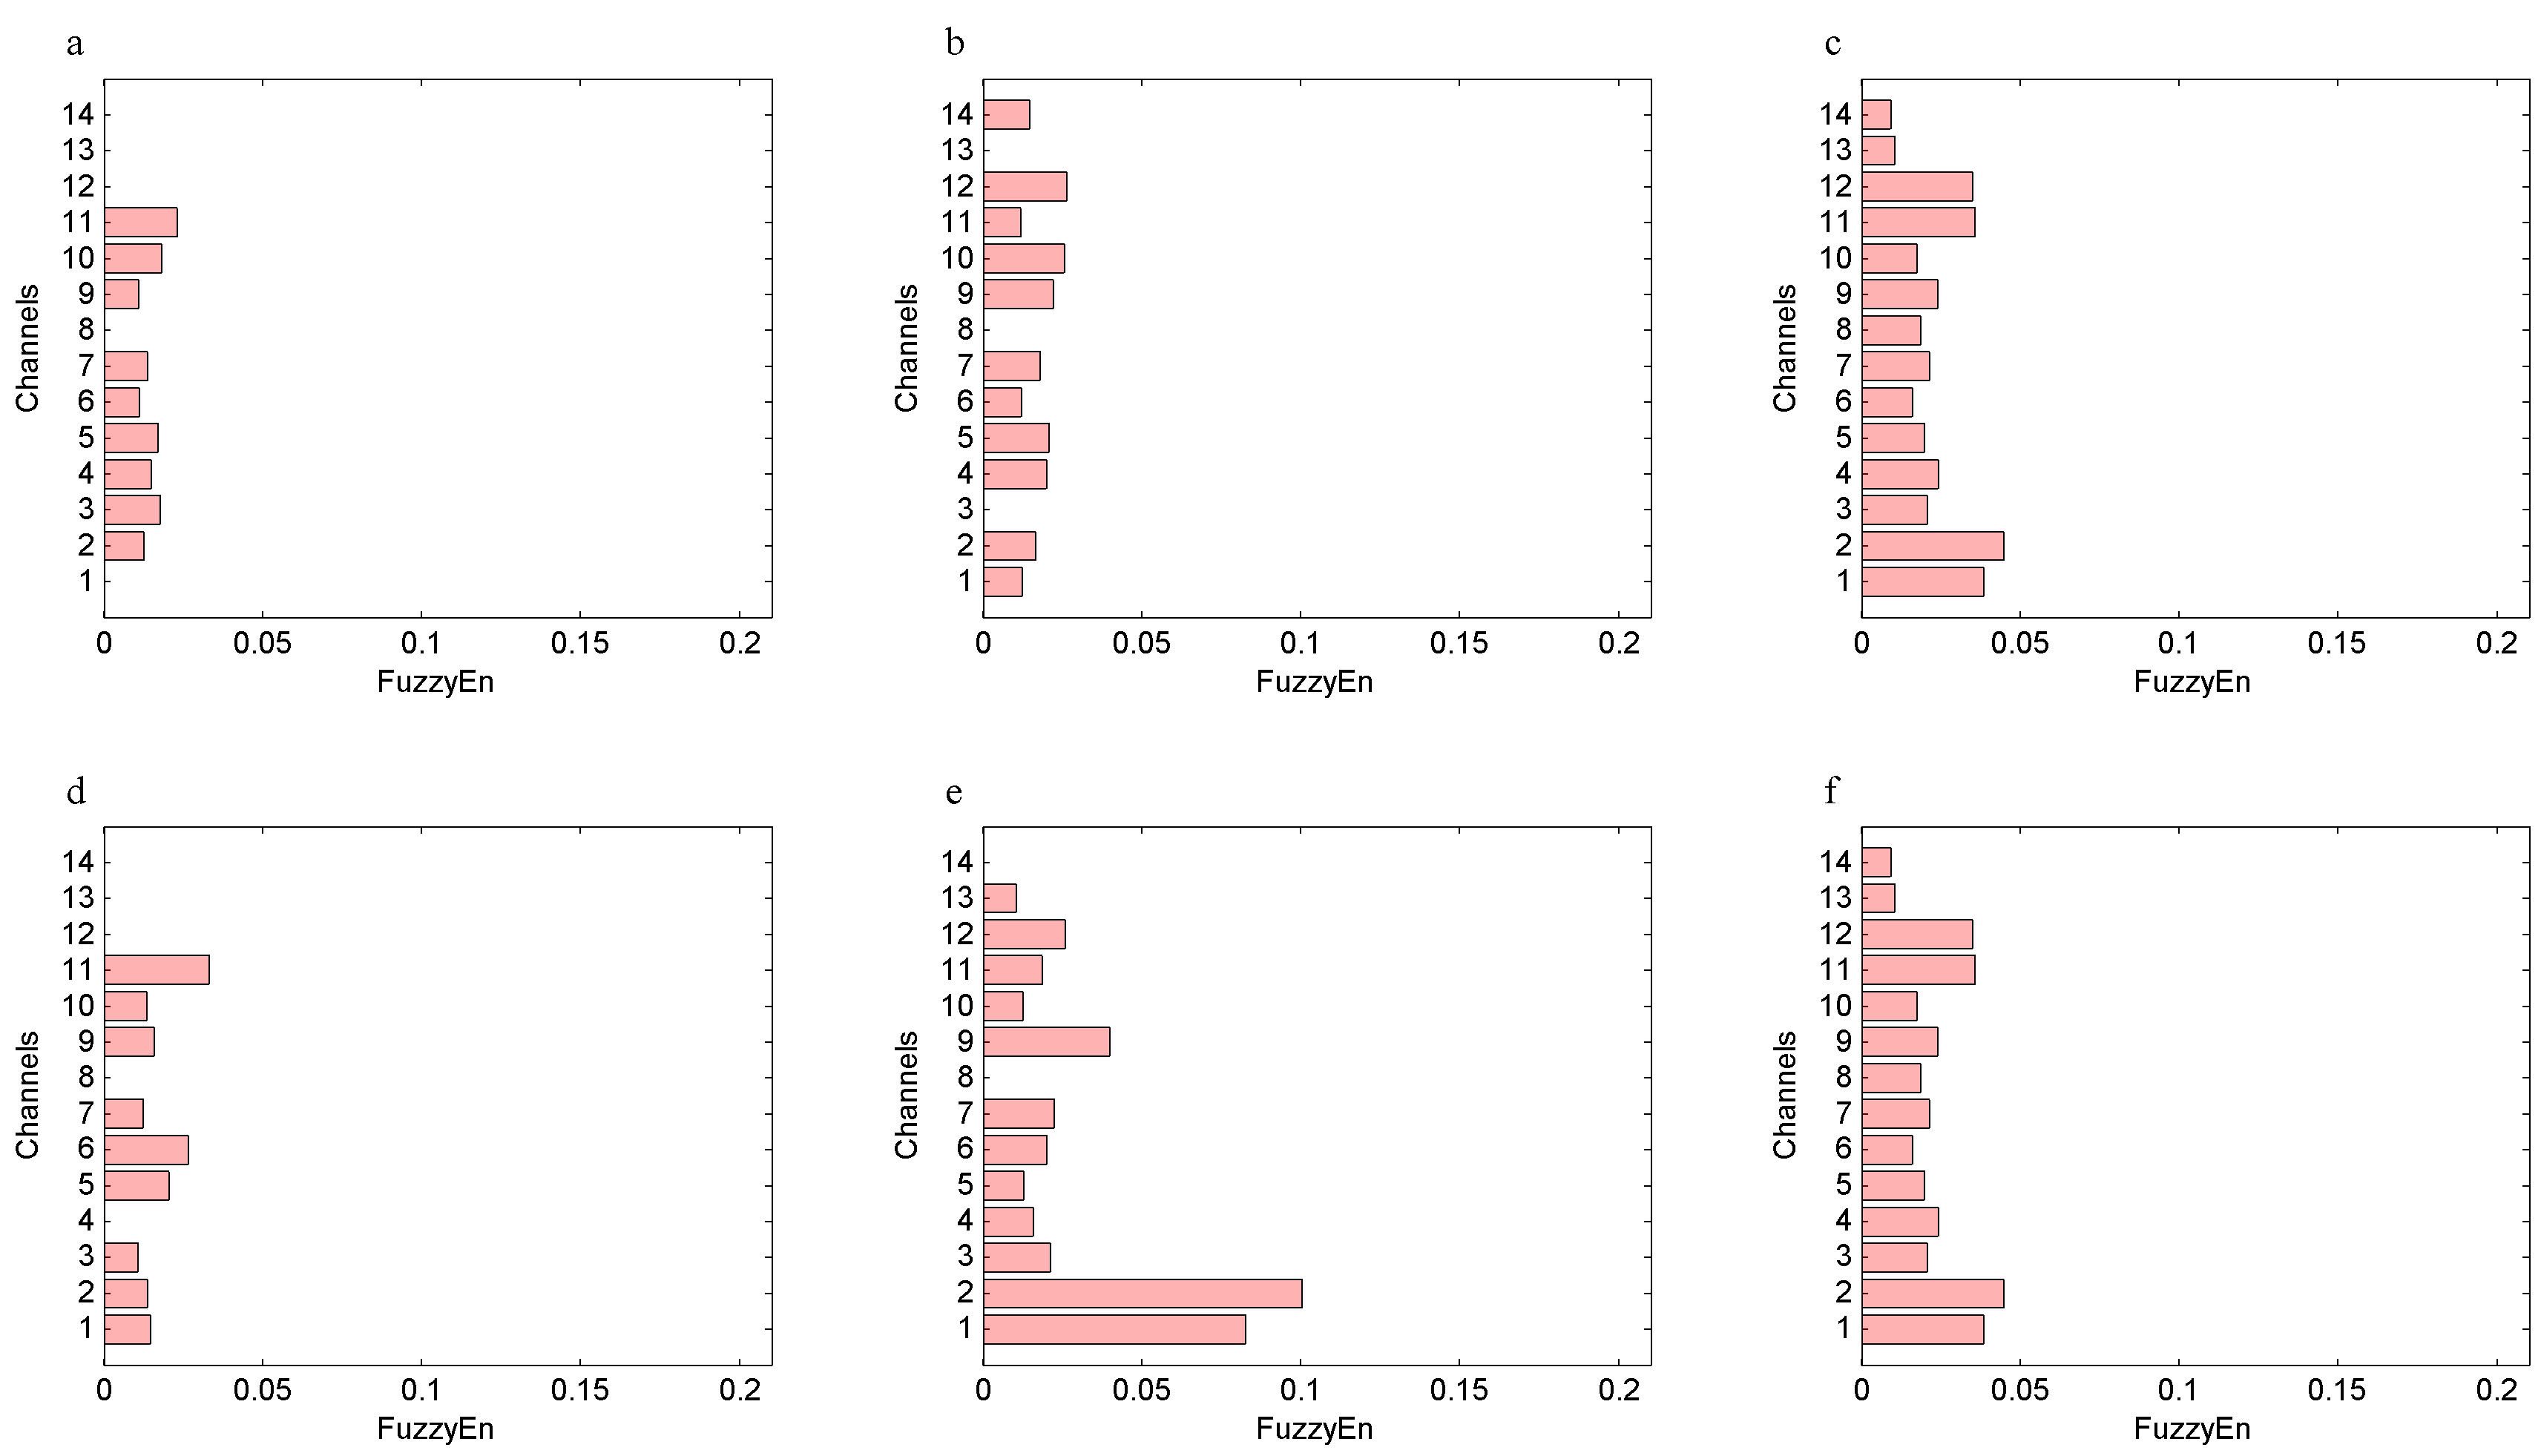


**Figure S17:** Facial muscle activity representations on a 3D face model based on the FuzzyEn method for the surprised facial expression. A) Estimated muscle activities of patient A before rehabilitation. B) Estimated muscle activities of patient A after rehabilitation. C, F) Mean value of estimated muscle activities of ten healthy individuals. D) Estimated muscle activities of patient B before rehabilitation. E) Estimated muscle activities of patient B after rehabilitation.


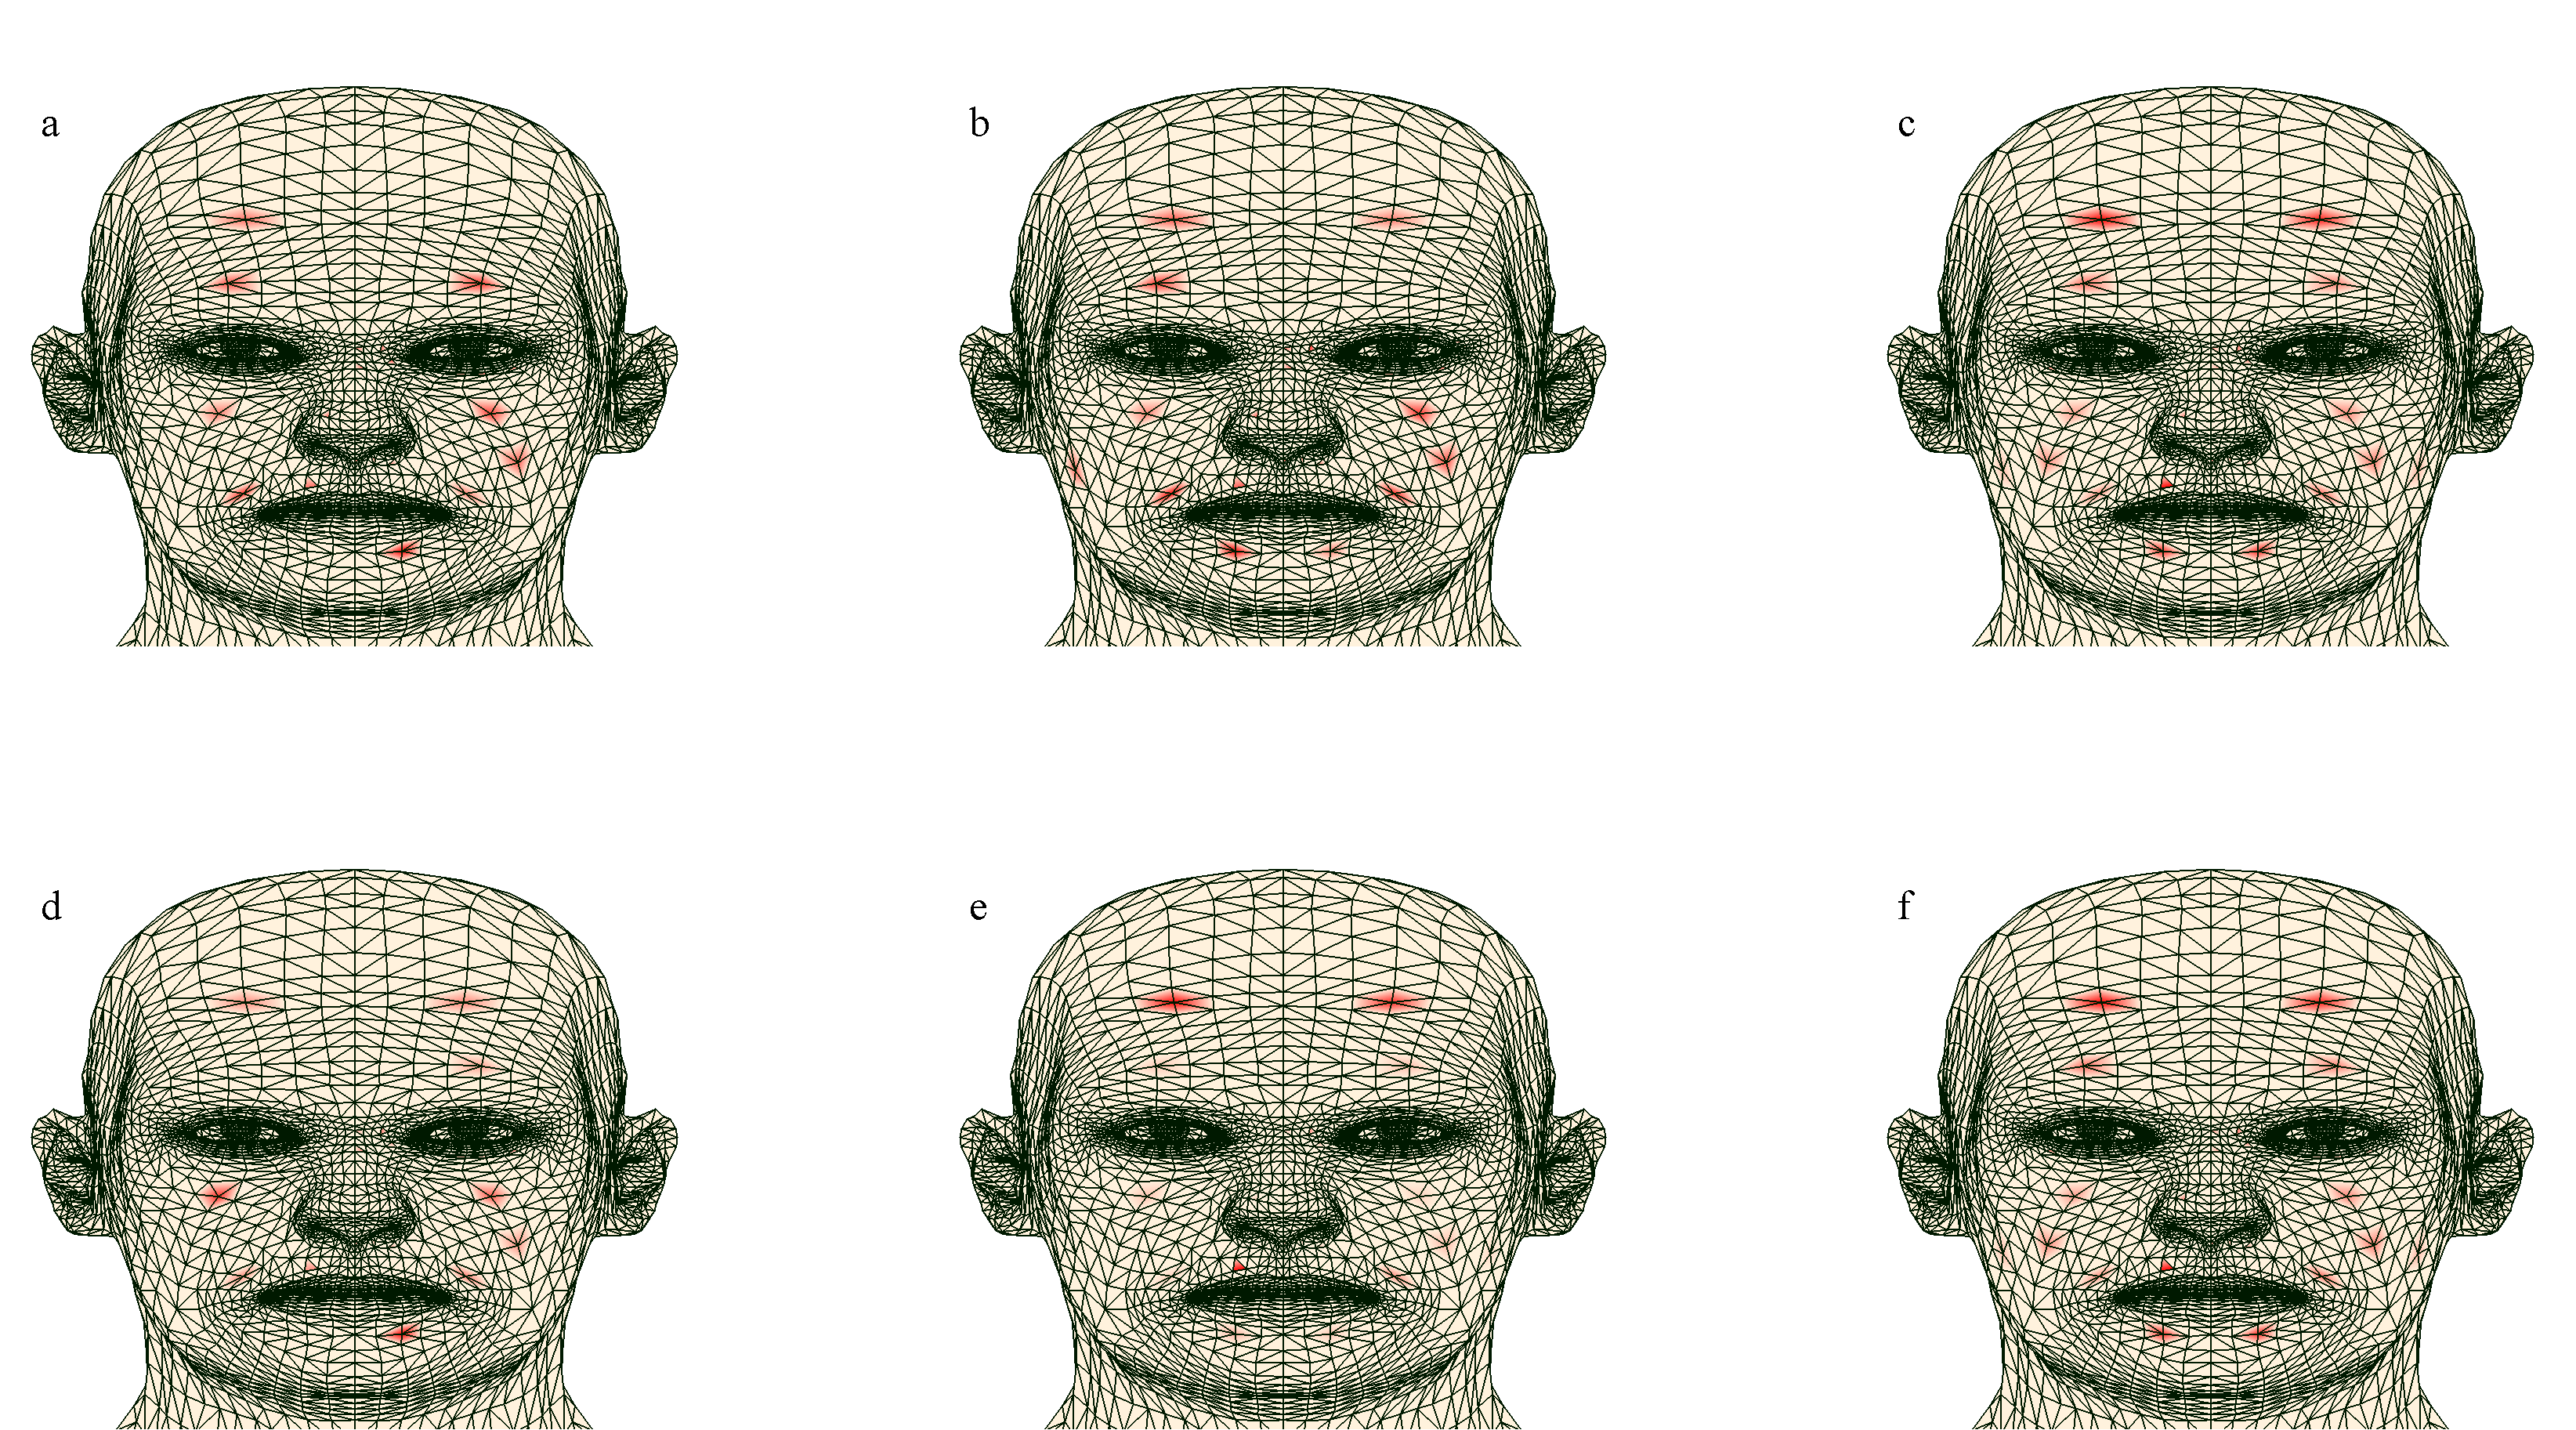


Table S1: Selected functional electrical stimulation channels of patient A during rehabilitation.

| Patient A | channel-1 | channel-2 | channel-3 | channel-4 | channel-5 | channel-6 | channel-7 | channel-8 | channel-9 | channel-10 | channel-11 | channel-12 | channel-13 | channel-14 |
| --- | --- | --- | --- | --- | --- | --- | --- | --- | --- | --- | --- | --- | --- | --- |
| lip funneler |  |  |  |  |  | X |  |  | X |  |  | X | X |  |
| lid tightener |  |  |  |  |  | X | X |  |  |  |  |  | X |  |
| lip puckerer |  |  |  |  |  |  | X | X |  |  |  | X |  |  |
| outer brow raiser | X | X | X | X | X |  | X |  |  |  |  |  |  |  |
| anger | X |  |  |  |  |  | X | X |  |  |  | X |  |  |
| fear |  |  |  |  |  |  | X | X | X |  | X | X | X |  |
| happiness |  |  |  |  | X |  | X | X | X | X | X | X | X |  |
| hateful/disgust |  |  |  |  |  |  | X | X | X |  |  | X | X |  |
| surprised | X |  |  |  |  |  | X | X |  |  |  | X | X |  |
| sadness | X |  |  |  |  |  | X | X |  |  |  | X |  |  |

Table S2: Selected functional electrical stimulation channels of patient B during rehabilitation.

| Patient B | channel-1 | channel-2 | channel-3 | channel-4 | channel-5 | channel-6 | channel-7 | channel-8 | channel-9 | channel-10 | channel-11 | channel-12 | channel-13 | channel-14 |
| --- | --- | --- | --- | --- | --- | --- | --- | --- | --- | --- | --- | --- | --- | --- |
| lip funneler |  |  |  |  |  | X |  | X |  |  | X | X |  |  |
| lid tightener | X | X | X | X |  |  |  |  |  |  |  |  |  |  |
| lip puckerer |  |  |  |  | X | X | X | X |  |  |  |  |  |  |
| outer brow raiser | X | X | X | X |  |  |  |  |  |  |  |  | X |  |
| anger | X | X | X | X |  |  |  |  |  |  |  |  | X |  |
| fear | X | X |  |  |  |  |  |  | X |  |  |  |  |  |
| happiness |  |  |  |  |  |  | X | X |  |  | X | X |  |  |
| hateful/disgust |  | X |  |  |  |  | X | X |  |  |  |  | X |  |
| surprised | X | X |  | X |  |  | X | X |  |  | X |  |  | X |
| sadness |  | X |  |  |  |  | X | X |  |  |  |  |  |  |

Table S3: Summary of data used.

| Code | Age | Sex | Height | Weight |
| --- | --- | --- | --- | --- |
| V01 | 35 | m | 180 | 82 |
| V02 | 36 | m | 189 | 102 |
| V03 | 35 | m | 182 | 81 |
| V04 | 35 | m | 174 | 65 |
| V05 | 35 | m | 185 | 82 |
| V06 | 30 | m | 178 | 83 |
| V07 | 29 | m | 170 | 60 |
| V08 | 27 | m | 182 | 112 |
| V09 | 24 | m | 170 | 75 |
| V10 | 21 | m | 178 | 87 |
|  | Average age: 31 | Total number: 10 | | |

Table S4: Semmes-Weinstein’s monofilament test results for patient A at 19 and 39 months after surgery.

| Patient A | **Touch (19 months)**  **(After surgery)** | | **Touch (39 months)**  **(After surgery)** | |
| --- | --- | --- | --- | --- |
|  | Right | Left | Right | Left |
| Forehead | 2.83 | 2.83 | 3.61 | 3.61 |
| Above Eyebrows | 2.83 | 2.83 | 3.61 | 3.61 |
| Eyelid | 2.83 | 2.83 | 3.61 | 3.61 |
| Eyebrow midpoint | 2.83 | ND | 4.31 | ND |
| Nose | 2.83 | 2.83 | 4.31 | 4.31 |
| Upper lip | 2.83 | ND | 4.31 | ND |
| Lower lip | 2.83 | ND | 4.31 | ND |
| Chin | 2.83 | 3.61 | 4.56 | 4.56 |
| Below Ear | 3.61 | 3.61 | 4.56 | 4.56 |
| Cheek | 2.83 | 2.83 | 4.31 | 4.31 |

(ND: Not determined)

Table S5: Semmes-Weinstein’s monofilament test results for patient B at 23 and 43 months after surgery.

| Patient B | **Touch (23 months)**  **(After surgery)** | | **Touch (43 months)**  **(After surgery)** | |
| --- | --- | --- | --- | --- |
|  | Right | Left | Right | Left |
| Forehead | 2.83 | 2.83 | 3.61 | 3.61 |
| Above Eyebrows | 3.61 | 3.61 | 3.61 | 3.61 |
| Eyelid | 3.61 | 3.61 | 4.31 | 4.31 |
| Eyebrow midpoint | 3.61 | ND | 3.61 | ND |
| Nose | 2.83 | 2.83 | 3.61 | 3.61 |
| Upper lip | 3.61 | ND | 4.31 | ND |
| Lower lip | 3.61 | ND | 4.31 | ND |
| Chin | 3.61 | 3.61 | 4.31 | 4.31 |
| Below Ear | ND | ND | 4.31 | 4.56 |
| Cheek | 2.83 | 2.83 | 4.31 | 4.56 |

(ND: Not determined)
